# Supplementary material
Source: PubMed Central journal article supplement (PMC4885108)
Supplement: jm6b00372_si_001.pdf [file jm6b00372_si_001.pdf]

# Exploration of a structure-activity relationship for the 4(3*H*)-quinazolinone antibiotics

*Renee Bouley*<sup>†</sup>, *Derong Ding*<sup>†</sup>, *Zhihong Peng*<sup>†</sup>, *Maria Bastian*<sup>†</sup>, *Elena Lastochkin*<sup>†</sup>, *Wei Song*<sup>†</sup>,  
*Mark A. Suckow*<sup>‡</sup>, *Valerie A. Schroeder*<sup>‡</sup>, *William R. Wolter*<sup>‡</sup>, *Shahriar Mobashery*<sup>†\*</sup>, *Mayland  
Chang*<sup>†\*</sup>.

<sup>†</sup>Department of Chemistry and Biochemistry and <sup>‡</sup>Freimann Life Sciences Center and  
Department of Biological Sciences, University of Notre Dame, Notre Dame, IN 46556, USA

## Supporting Information

### Contents

|                                                                                           |     |
|-------------------------------------------------------------------------------------------|-----|
| Figure S1. MRSA COL sensitization to antibacterials through antisense PBP knockdown ..... | S2  |
| Table S1. Experimental procedures and characterization data of reported compounds .....   | S3  |
| Table S2. MICs of reported compounds against <i>S. aureus</i> and <i>E. faecium</i> ..... | S24 |
| References .....                                                                          | S34 |

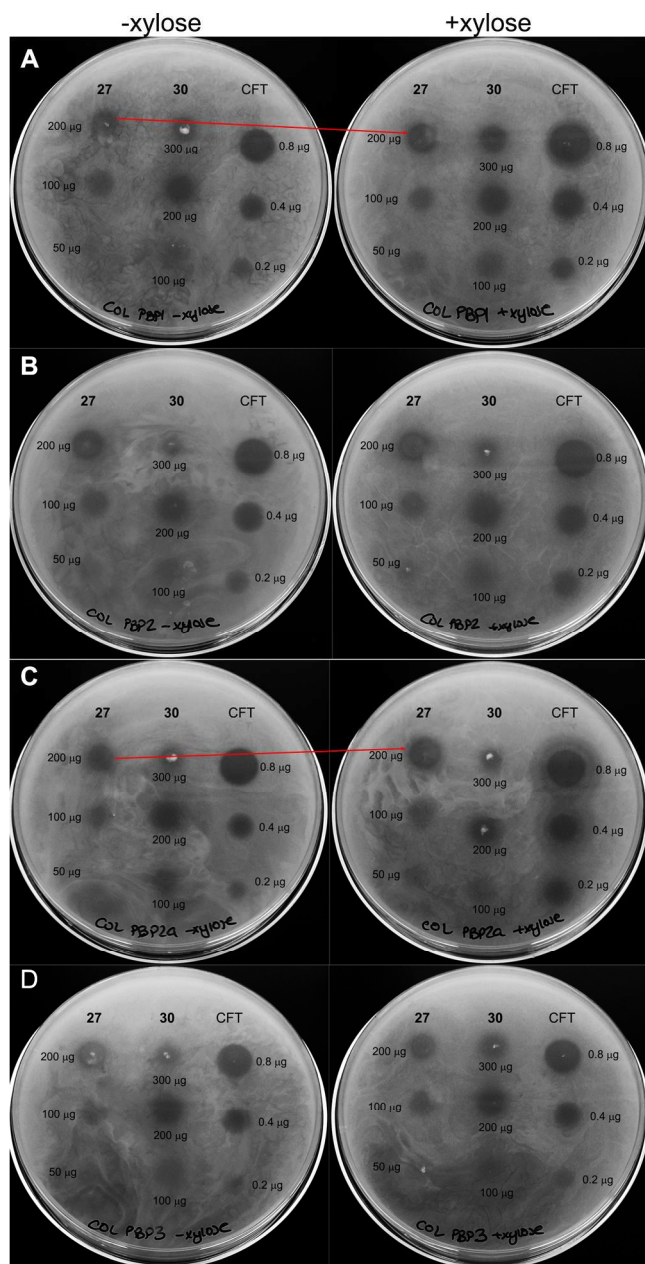

**Figure S1.** MRSA COL sensitization to antibacterials through antisense PBP knockdown. Left column shows background growth inhibition of the COL strain in the absence of xylose and right column shows activity in the presence of 50 mM xylose. (A) COL PBP1 antisense strain; (B) COL PBP2 antisense strain; (C) COL PBP2a antisense strain; (D) COL PBP3 antisense strain. Plates were spotted with compound **27** (left top to bottom: 200, 100, and 50 µg), compound **30** (middle top to bottom: 300, 200, and 100 µg), and ceftaroline (CFT; right top to bottom: 0.8, 0.4, and 0.2 µg). Precipitation at the highest concentration of compound **30** occurred upon spotting onto the plate. Red arrows highlight large changes in zones of inhibition in the presence of xylose for compound **27**.

**Table S1.** Experimental procedures and characterization data of reported compounds

| Structure                                                                           | Experimental procedure and characterization data                                                                                                                                                                                                                                                                                                                                                                                                                                                                                                                                                                                                                                                                                                                                                                                                                                                                                                                                     |
|-------------------------------------------------------------------------------------|--------------------------------------------------------------------------------------------------------------------------------------------------------------------------------------------------------------------------------------------------------------------------------------------------------------------------------------------------------------------------------------------------------------------------------------------------------------------------------------------------------------------------------------------------------------------------------------------------------------------------------------------------------------------------------------------------------------------------------------------------------------------------------------------------------------------------------------------------------------------------------------------------------------------------------------------------------------------------------------|
| 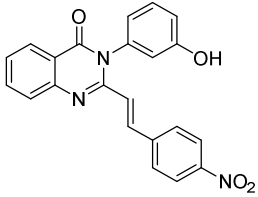   | <p><b>(E)-3-(3-hydroxyphenyl)-2-(4-nitrostyryl)quinazolin-4(3H)-one (1).</b> This compound was prepared according to the procedure for <b>5</b> in 65% yield (0.12 g). <sup>1</sup>H NMR (500 MHz, DMSO-<i>d</i><sub>6</sub>) δ 6.56 (d, <i>J</i>=15.55 Hz, 1H), 6.86 (m, 2H), 6.98 (d, <i>J</i> = 7.78 Hz, 1H), 7.38 (t, <i>J</i> = 7.78 Hz, 1H), 7.55 (t, <i>J</i> = 7.38 Hz, 1H), 7.63 (d, <i>J</i> = 8.37 Hz, 2H), 7.77 (d, <i>J</i> = 8.17 Hz, 1H), 7.88 (t, <i>J</i> = 7.58 Hz, 1H), 7.94 (d, <i>J</i> = 15.55 Hz, 1H), 8.13 (d, <i>J</i> = 7.58 Hz, 1H), 8.18 (d, <i>J</i> = 8.57 Hz, 2H). <sup>13</sup>C NMR (126 MHz, DMSO-<i>d</i><sub>6</sub>) δ 115.89, 116.50, 118.97, 120.82, 124.20, 126.48, 127.0, 127.31, 128.46, 130.35, 134.77, 136.10, 137.55, 141.28, 147.13, 147.47, 150.78, 158.68, 160.95. HRMS (<i>m/z</i>): [M + H]<sup>+</sup>, calcd for C<sub>22</sub>H<sub>16</sub>N<sub>3</sub>O<sub>4</sub>, 386.1135; found, 386.1127.</p>                          |
|   | <p><b>(E)-3-(3-carboxyphenyl)-2-(4-cyanostyryl)quinazolin-4(3H)-one (2).</b> The compound was prepared according to the procedure described previously (0.77 g, 75% yield). <sup>1</sup>H NMR (600 MHz, DMSO-<i>d</i><sub>6</sub>) δ 6.47 (d, <i>J</i> = 15.55 Hz, 1H), 7.56 (t, <i>J</i> = 7.34 Hz, 1H), 7.59 (d, <i>J</i> = 8.22 Hz, 2H), 7.73 (m, 2H), 7.79 (m, 3H), 7.90 (m, 2H), 8.05 (s, 1H), 8.12 (m, 2H). <sup>13</sup>C NMR (126 MHz, DMSO-<i>d</i><sub>6</sub>) δ 111.56, 118.61, 120.76, 123.42, 126.50, 127.01, 127.35, 128.26, 129.99, 130.06, 130.12, 132.33, 132.83, 133.46, 134.89, 136.95, 137.03, 139.25, 147.21, 150.74, 161.25, 166.52. HRMS (<i>m/z</i>): [M + Na]<sup>+</sup>, calcd for C<sub>24</sub>H<sub>15</sub>N<sub>3</sub>NaO<sub>3</sub>, 416.1006; found, 416.0987. HRMS (<i>m/z</i>): [M + H]<sup>+</sup>, calcd for C<sub>24</sub>H<sub>16</sub>N<sub>3</sub>O<sub>3</sub>, 394.1186; found, 394.1214.</p>                                         |
|  | <p><b>(E)-3-(3-hydroxyphenyl)-2-(3-nitrostyryl)quinazolin-4(3H)-one (3).</b> This compound was prepared according to the procedure for <b>5</b> in 79% yield (0.18 g). <sup>1</sup>H NMR (500 MHz, DMSO-<i>d</i><sub>6</sub>) δ 5.62 (d, <i>J</i> = 15.55 Hz, 1H), 5.98 (m, 2H), 6.08 (d, <i>J</i> = 6.98 Hz, 1H), 6.51 (t, <i>J</i> = 7.58 Hz, 1H), 6.65 (t, <i>J</i> = 6.58 Hz, 1H), 6.75 (t, <i>J</i> = 7.58 Hz, 1H), 6.67 (d, <i>J</i> = 7.58 Hz, 1H), 6.91 (d, <i>J</i> = 7.18 Hz, 1H), 6.99 (t, <i>J</i> = 6.98 Hz, 1H), 7.06 (d, <i>J</i> = 15.55 Hz, 1H), 7.26 (m, 3H), 9.06 (br. s, 1H). <sup>13</sup>C NMR (126 MHz, DMSO-<i>d</i><sub>6</sub>) δ 115.90, 116.39, 119.17, 120.79, 121.94, 122.88, 123.92, 126.50, 126.91, 127.26, 130.36, 130.59, 133.29, 134.80, 136.23, 136.68, 137.64, 147.20, 148.28, 150.91, 158.48, 161.00. HRMS (<i>m/z</i>): [M + H]<sup>+</sup>, calcd for C<sub>22</sub>H<sub>16</sub>N<sub>3</sub>O<sub>4</sub>, 386.1135; found, 386.1138.</p> |
|  | <p><b>(E)-3-(3-hydroxyphenyl)-2-(2-nitrostyryl)quinazolin-4(3H)-one (4).</b> This compound was purchased from ChemDiv.</p>                                                                                                                                                                                                                                                                                                                                                                                                                                                                                                                                                                                                                                                                                                                                                                                                                                                           |

|                                                                                     |                                                                                                                                                                                                                                                                                                                                                                                                                                                                                                                                                                                                                                                                                                                                                                                                                                                                                                                                                                                                                                                                                                                                                                                                                                                                                                     |
|-------------------------------------------------------------------------------------|-----------------------------------------------------------------------------------------------------------------------------------------------------------------------------------------------------------------------------------------------------------------------------------------------------------------------------------------------------------------------------------------------------------------------------------------------------------------------------------------------------------------------------------------------------------------------------------------------------------------------------------------------------------------------------------------------------------------------------------------------------------------------------------------------------------------------------------------------------------------------------------------------------------------------------------------------------------------------------------------------------------------------------------------------------------------------------------------------------------------------------------------------------------------------------------------------------------------------------------------------------------------------------------------------------|
| 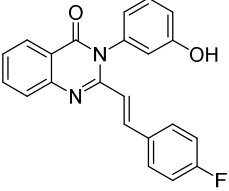   | <p><b>(E)-3-(3-hydroxyphenyl)-2-(4-fluorostyryl)quinazolin-4(3H)-one (5).</b> 3-(3-hydroxyphenyl)-2-methylquinazolin-4(3H)-one (0.25 g, 1 mmol) was suspended in 5 mL glacial acetic acid and dissolved upon heating, to which 4-fluorobenzaldehyde (0.11 mL, 1 mmol) was added. The reaction was refluxed overnight (18 h) and 10 mL water was added to the cooled reaction mixture. The resulting precipitate was filtered and washed with water, followed by cold ethanol and hexanes to give the product (0.14 g, 40% yield). <sup>1</sup>H NMR (500 MHz, DMSO-<i>d</i><sub>6</sub>) δ 6.32 (d, <i>J</i> = 15.55 Hz, 1H), 6.83 (s, 1H), 6.84 (d, <i>J</i> = 7.78 Hz, 1H), 6.96 (d, <i>J</i> = 8.17 Hz, 1H), 7.22 (m, 2H), 7.40 (t, <i>J</i> = 7.98 Hz, 1H), 7.44 (m, 2H), 7.53 (t, <i>J</i> = 8.17 Hz, 1H), 7.75 (d, <i>J</i> = 8.17 Hz, 1H), 7.87 (m, 2H), 8.12 (d, <i>J</i> = 7.78 Hz, 1H), 9.92 (s, 1H). <sup>13</sup>C NMR (126 MHz, DMSO-<i>d</i><sub>6</sub>) δ 116.55, 116.75, 116.92, 117.00, 120.00, 120.57, 121.35, 127.18, 127.18, 127.85, 130.35, 130.41, 131.11, 132.25, 135.45, 138.15, 138.56, 148.05, 151.98, 159.03, 161.80, 162.52. HRMS (<i>m/z</i>): [M + H]<sup>+</sup>, calcd for C<sub>22</sub>H<sub>16</sub>FN<sub>2</sub>O<sub>2</sub>, 359.1190; found, 359.1186.</p> |
|   | <p><b>(E)-3-(3-hydroxyphenyl)-2-(3-fluorostyryl)quinazolin-4(3H)-one (6).</b> This compound was prepared according to the procedure for <b>5</b> in 12% yield (0.086 g). <sup>1</sup>H NMR (500 MHz, DMSO-<i>d</i><sub>6</sub>) δ 6.42 (d, <i>J</i> = 15.55 Hz, 1H), 6.83 (s, 1H), 6.84 (d, <i>J</i> = 7.58 Hz, 1H), 6.97 (d, <i>J</i> = 7.98 Hz, 1H), 7.20 (m, 2H), 7.25 (d, <i>J</i> = 8.57 Hz, 1H), 7.40 (m, 2H), 7.55 (t, <i>J</i> = 7.18 Hz, 1H), 7.76 (d, <i>J</i> = 7.98 Hz, 1H), 7.84 (d, <i>J</i> = 15.75 Hz, 1H), 7.88 (t, <i>J</i> = 8.37 Hz, 1H), 8.13 (d, <i>J</i> = 7.98 Hz, 1H), 9.92 (s, 1H). HRMS (<i>m/z</i>): [M + H]<sup>+</sup>, calcd for C<sub>22</sub>H<sub>16</sub>FN<sub>2</sub>O<sub>2</sub>, 359.1190; found, 359.1211.</p>                                                                                                                                                                                                                                                                                                                                                                                                                                                                                                                                             |
|  | <p><b>(E)-3-(3-hydroxyphenyl)-2-(2-fluorostyryl)quinazolin-4(3H)-one (7).</b> This compound was purchased from ChemDiv.</p>                                                                                                                                                                                                                                                                                                                                                                                                                                                                                                                                                                                                                                                                                                                                                                                                                                                                                                                                                                                                                                                                                                                                                                         |
|  | <p><b>(E)-3-(3-hydroxyphenyl)-2-(3-fluorostyryl)quinazolin-4(3H)-one (8).</b> This compound was prepared according to the procedure for <b>5</b> in 66% yield (0.29 g). <sup>1</sup>H NMR (500 MHz, DMSO-<i>d</i><sub>6</sub>) δ 6.38 (d, <i>J</i> = 15.55 Hz, 1H), 6.83 (m, 2H), 6.96 (d, <i>J</i> = 8.17 Hz, 1H), 7.41 (m, 5H), 7.54 (t, <i>J</i> = 8.17 Hz, 1H), 7.76 (d, <i>J</i> = 7.78 Hz, 1H), 7.85 (m, 2H), 8.12 (d, <i>J</i> = 7.78 Hz, 1H), 9.93 (s, 1H). <sup>13</sup>C NMR (126 MHz, DMSO-<i>d</i><sub>6</sub>) δ 116.01, 116.49, 119.46, 120.85, 120.91, 126.64, 126.85, 127.35, 129.31, 130.58, 133.97, 134.38, 134.93, 137.43, 137.97, 147.47, 151.33, 158.49, 161.24. HRMS (<i>m/z</i>): [M + H]<sup>+</sup>, calcd for C<sub>22</sub>H<sub>16</sub>ClN<sub>2</sub>O<sub>2</sub>, 375.0895; found, 375.0892.</p>                                                                                                                                                                                                                                                                                                                                                                                                                                                                    |

|                                                                                     |                                                                                                                                                                                                                                                                                                                                                                                                                                                                                                                                                                                                                                                                                                                                                                                                                                                                                                                                                                                                                                                                                                                                                            |
|-------------------------------------------------------------------------------------|------------------------------------------------------------------------------------------------------------------------------------------------------------------------------------------------------------------------------------------------------------------------------------------------------------------------------------------------------------------------------------------------------------------------------------------------------------------------------------------------------------------------------------------------------------------------------------------------------------------------------------------------------------------------------------------------------------------------------------------------------------------------------------------------------------------------------------------------------------------------------------------------------------------------------------------------------------------------------------------------------------------------------------------------------------------------------------------------------------------------------------------------------------|
| 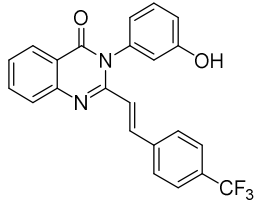   | <p><b>(E)-3-(3-hydroxyphenyl)-2-(4-(trifluoromethyl)styryl)quinazolin-4(3H)-one (9).</b> This compound was prepared according to the procedure for <b>5</b> in 54% yield (0.13 g). <math>^1\text{H}</math> NMR (300 MHz, DMSO-<math>d_6</math>) <math>\delta</math> 6.50 (d, <math>J</math> = 15.55 Hz, 1H), 6.81 (m, 2H), 6.93 (d, <math>J</math> = 8.13 Hz, 1H), 7.36 (t, <math>J</math> = 8.13 Hz, 1H), 7.57 (m, 3H), 7.71 (d, <math>J</math> = 8.37 Hz, 2H), 7.77 (d, <math>J</math> = 8.37 Hz, 1H), 7.89 (t, <math>J</math> = 7.18 Hz, 1H), 7.90 (d, <math>J</math> = 15.79 Hz, 1H), 8.12 (d, <math>J</math> = 8.13 Hz, 1H). <math>^{13}\text{C}</math> NMR (126 MHz, DMSO-<math>d_6</math>) <math>\delta</math> 115.88, 116.39, 119.20, 120.78, 122.78, 125.91, 126.48, 126.85, 127.26, 128.03, 130.41, 134.76, 136.81, 137.71, 138.84, 147.20, 150.92, 158.47, 161.02. HRMS (<math>m/z</math>): <math>[\text{M} + \text{H}]^+</math>, calcd for <math>\text{C}_{23}\text{H}_{16}\text{F}_3\text{N}_2\text{O}_2</math>, 409.1158; found, 409.1168.</p>                                                                                               |
|    | <p><b>(E)-3-(3-hydroxyphenyl)-2-(4-methylstyryl)quinazolin-4(3H)-one (10).</b> This compound was prepared according to the procedure for <b>5</b> in 47% yield (0.13 g). <math>^1\text{H}</math> NMR (500 MHz, DMSO-<math>d_6</math>) <math>\delta</math> 2.29 (s, 3H), 6.31 (d, <math>J</math> = 15.55 Hz, 1H), 6.82 (m, 2H), 6.96 (d, <math>J</math> = 7.98 Hz, 1H), 7.19 (d, <math>J</math> = 7.78 Hz, 2H), 7.26 (d, <math>J</math> = 7.78 Hz, 2H), 7.40 (t, <math>J</math> = 7.98 Hz, 1H), 7.52 (t, <math>J</math> = 7.58 Hz, 1H), 7.75 (d, <math>J</math> = 8.17 Hz, 1H), 7.84 (m, 2H), 8.12 (d, <math>J</math> = 7.78 Hz, 1H), 9.92 (s, 1H). <math>^{13}\text{C}</math> NMR (126 MHz, DMSO-<math>d_6</math>) <math>\delta</math> 20.98, 115.84, 116.24, 118.90, 119.30, 120.57, 126.45, 127.12, 127.45, 129.69, 130.39, 132.17, 134.71, 137.93, 138.72, 139.72, 147.41, 151.46, 158.32, 161.13. HRMS (<math>m/z</math>): <math>[\text{M} + \text{H}]^+</math>, calcd for <math>\text{C}_{23}\text{H}_{19}\text{N}_2\text{O}_2</math>, 355.1441; found, 355.1469.</p>                                                                                 |
|  | <p><b>(E)-3-(3-hydroxyphenyl)-2-(4-ethylstyryl)quinazolin-4(3H)-one (11).</b> This compound was prepared according to the procedure for <b>5</b> in 42% yield (0.31 g). <math>^1\text{H}</math> NMR (500 MHz, DMSO-<math>d_6</math>) <math>\delta</math> 1.14 (t, <math>J</math> = 7.18 Hz, 3H), 2.57 (d, <math>J</math> = 7.18 Hz, 2H), 6.32 (d, <math>J</math> = 15.55 Hz, 1H), 6.83 (m, 2H), 6.97 (d, <math>J</math> = 7.58 Hz, 1H), 7.20 (d, <math>J</math> = 7.38 Hz, 2H), 7.27 (d, <math>J</math> = 7.38 Hz, 2H), 7.40 (t, <math>J</math> = 7.98 Hz, 1H), 7.52 (t, <math>J</math> = 6.98 Hz, 1H), 7.75 (d, <math>J</math> = 7.58 Hz, 1H), 7.85 (m, 2H), 8.11 (d, <math>J</math> = 7.78 Hz, 1H), 9.92 (s, 1H). <math>^{13}\text{C}</math> NMR (126 MHz, DMSO-<math>d_6</math>) <math>\delta</math> 15.35, 28.04, 115.86, 116.25, 119.01, 119.30, 120.58, 126.44, 127.11, 127.52, 128.51, 130.40, 132.45, 134.69, 137.95, 138.71, 145.94, 147.31, 147.41, 158.36, 160.24, 161.13. HRMS (<math>m/z</math>): <math>[\text{M} + \text{H}]^+</math>, calcd for <math>\text{C}_{24}\text{H}_{21}\text{N}_2\text{O}_2</math>, 369.1598; found, 369.1613.</p> |
|  | <p><b>(E)-3-(3-hydroxyphenyl)-2-(4-isopropylstyryl)quinazolin-4(3H)-one (12).</b> This compound was prepared according to the procedure for <b>5</b> in 32% yield (0.15 g). <math>^1\text{H}</math> NMR (500 MHz, DMSO-<math>d_6</math>) <math>\delta</math> 1.16 (d, <math>J</math> = 6.78 Hz, 6H), 2.86 (m, <math>J</math> = 6.98 Hz, 1H), 6.32 (d, <math>J</math> = 15.55 Hz, 1H), 6.82 (m, 2H), 6.97 (d, <math>J</math> = 8.17 Hz, 1H), 7.23 (d, <math>J</math> = 7.98 Hz, 2H), 7.28 (d, <math>J</math> = 8.17 Hz, 2H), 7.39 (t, <math>J</math> = 7.98 Hz, 1H), 7.52 (t, <math>J</math> = 7.38 Hz, 1H), 7.75 (d, <math>J</math> = 7.98 Hz, 1H), 7.84 (m, 2H), 8.12 (d, <math>J</math> = 7.78 Hz, 1H), 9.92 (s, 1H). <math>^{13}\text{C}</math> NMR (126 MHz, DMSO-<math>d_6</math>) <math>\delta</math> 23.58, 33.30, 115.85,</p>                                                                                                                                                                                                                                                                                                                      |

|                                                                                     |                                                                                                                                                                                                                                                                                                                                                                                                                                                                                                                                                                                                                                                                                                                                                                                                                                                                                                                                                                                                               |
|-------------------------------------------------------------------------------------|---------------------------------------------------------------------------------------------------------------------------------------------------------------------------------------------------------------------------------------------------------------------------------------------------------------------------------------------------------------------------------------------------------------------------------------------------------------------------------------------------------------------------------------------------------------------------------------------------------------------------------------------------------------------------------------------------------------------------------------------------------------------------------------------------------------------------------------------------------------------------------------------------------------------------------------------------------------------------------------------------------------|
|                                                                                     | 116.22, 119.09, 119.28, 120.57, 126.44, 127.05, 127.10, 127.52, 130.37, 132.60, 134.69, 137.93, 138.65, 147.40, 160.49, 151.44, 158.32, 161.09. HRMS ( $m/z$ ): $[M + Na]^+$ , calcd for $C_{25}H_{22}N_2NaO_2$ , 405.1573; found, 405.1599.                                                                                                                                                                                                                                                                                                                                                                                                                                                                                                                                                                                                                                                                                                                                                                  |
| 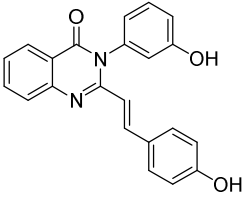   | <p><b>(E)-3-(3-hydroxyphenyl)-2-(4-hydroxystyryl)quinazolin-4(3H)-one (13).</b> This compound was prepared according to the procedure for <b>5</b> in 33% yield (0.096 g). <math>^1H</math> NMR (500 MHz, DMSO-<math>d_6</math>) <math>\delta</math> 6.15 (d, <math>J = 15.55</math> Hz, 1H), 6.76 (m, 4H), 6.96 (d, <math>J = 7.38</math> Hz, 1H), 7.21 (d, <math>J = 7.58</math> Hz, 2H), 7.39 (t, <math>J = 7.58</math> Hz, 1H), 7.49 (t, <math>J = 7.18</math> Hz, 1H), 7.72 (d, <math>J = 7.98</math> Hz, 1H), 7.81 (m, 2H), 8.10 (d, <math>J = 7.78</math> Hz, 1H), 9.91 (s, 1H), 9.95 (s, 1H). <math>^{13}C</math> NMR (126 MHz, DMSO-<math>d_6</math>) <math>\delta</math> 116.53, 116.68, 116.89, 120.01, 121.10, 126.65, 127.13, 127.68, 130.07, 131.09, 135.36, 138.75, 139.81, 148.26, 152.51, 159.03, 160.03, 161.89. HRMS (<math>m/z</math>): <math>[M + H]^+</math>, calcd for <math>C_{22}H_{17}N_2O_3</math>, 357.1234; found, 357.1256.</p>                                                 |
|   | <p><b>(E)-3-(3-hydroxyphenyl)-2-(4-methoxystyryl)quinazolin-4(3H)-one (14).</b> This compound was prepared according to the procedure for <b>5</b> in 52% yield (0.15 g). <math>^1H</math> NMR (500 MHz, DMSO-<math>d_6</math>) <math>\delta</math> 3.76 (s, 3H), 6.21 (d, <math>J = 15.55</math> Hz, 1H), 6.82 (m, 2H), 6.93 (m, 3H), 7.32 (d, <math>J = 8.77</math> Hz, 2H), 7.40 (t, <math>J = 7.98</math> Hz, 1H), 7.51 (t, <math>J = 7.58</math> Hz, 1H), 7.73 (d, <math>J = 8.17</math> Hz, 1H), 7.84 (m, 2H), 8.11 (d, <math>J = 7.78</math> Hz, 1H), 9.92 (s, 1H). <math>^{13}C</math> NMR (126 MHz, DMSO-<math>d_6</math>) <math>\delta</math> 55.29, 114.52, 114.59, 115.83, 116.21, 117.34, 119.30, 120.48, 126.28, 126.44, 127.03, 127.50, 129.14, 130.39, 134.69, 138.00, 138.55, 147.48, 151.63, 158.32, 160.63, 161.15. HRMS (<math>m/z</math>): <math>[M + H]^+</math>, calcd for <math>C_{23}H_{19}N_2O_3</math>, 371.1390; found, 371.1413.</p>                                             |
|  | <p><b>(E)-3-(3-hydroxyphenyl)-2-(4-cyanostyryl)quinazolin-4(3H)-one (15).</b> This compound was prepared according to the procedure for <b>5</b> in 84% yield (0.62 g). <math>^1H</math> NMR (500 MHz, DMSO-<math>d_6</math>) <math>\delta</math> 6.51 (d, <math>J = 15.55</math> Hz, 1H), 6.85 (m, 2H), 6.97 (d, <math>J = 7.98</math> Hz, 1H), 7.39 (t, <math>J = 7.78</math> Hz, 1H), 7.55 (m, 3H), 7.77 (d, <math>J = 7.78</math> Hz, 1H), 7.81 (d, <math>J = 8.37</math> Hz, 2H), 7.88 (t, <math>J = 7.18</math> Hz, 1H), 7.89 (d, <math>J = 15.55</math> Hz, 1H), 8.12 (d, <math>J = 7.98</math> Hz, 1H), 9.94 (s, 1H). <math>^{13}C</math> NMR (126 MHz, DMSO-<math>d_6</math>) <math>\delta</math> 111.52, 115.87, 116.40, 118.61, 119.30, 120.81, 123.47, 126.50, 126.95, 127.29, 128.08, 130.42, 132.92, 134.80, 136.60, 137.65, 139.38, 147.17, 150.84, 158.32, 160.99. HRMS (<math>m/z</math>): <math>[M + H]^+</math>, calcd for <math>C_{23}H_{16}N_3O_2</math>, 366.1237; found, 366.1254.</p> |
|  | <p><b>(E)-3-(3-hydroxyphenyl)-2-(4-ethynylstyryl)quinazolin-4(3H)-one (16).</b> This compound was prepared according to the procedure for <b>5</b> in 22% yield (0.33 g). <math>^1H</math> NMR (500 MHz, DMSO-<math>d_6</math>) <math>\delta</math> 4.32 (s, 1H), 6.40 (d, <math>J = 15.55</math> Hz, 1H), 6.85 (m, 2H), 6.97 (d, <math>J = 8.18</math> Hz, 1H), 7.38 (m, 3H), 7.45 (d, <math>J = 7.17</math> Hz, 2H), 7.53 (t, <math>J = 7.18</math> Hz, 1H), 7.76 (d, <math>J = 7.98</math> Hz, 1H),</p>                                                                                                                                                                                                                                                                                                                                                                                                                                                                                                    |

|                                                                                     |                                                                                                                                                                                                                                                                                                                                                                                                                                                                                                                                                                                                                                                                                                                                                                                                                                                                           |
|-------------------------------------------------------------------------------------|---------------------------------------------------------------------------------------------------------------------------------------------------------------------------------------------------------------------------------------------------------------------------------------------------------------------------------------------------------------------------------------------------------------------------------------------------------------------------------------------------------------------------------------------------------------------------------------------------------------------------------------------------------------------------------------------------------------------------------------------------------------------------------------------------------------------------------------------------------------------------|
|                                                                                     | 7.86 (m, 2H), 8.12 (d, $J = 7.98$ Hz, 1H), 9.93 (s, 1H). $^{13}\text{C}$ NMR (126 MHz, DMSO- $d_6$ ) $\delta$ 82.69, 83.21, 115.86, 116.34, 119.30, 120.68, 121.08, 122.76, 126.46, 126.68, 127.20, 127.62, 130.41, 132.34, 134.72, 135.29, 137.59, 137.79, 147.28, 151.12, 158.32, 161.05. HRMS ( $m/z$ ): $[\text{M} + \text{H}]^+$ , calcd for $\text{C}_{24}\text{H}_{17}\text{N}_2\text{O}_2$ , 365.1285; found, 365.1288.                                                                                                                                                                                                                                                                                                                                                                                                                                           |
| 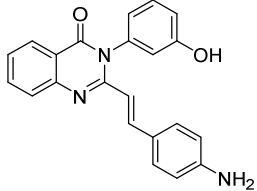   | <b>(E)-3-(3-hydroxyphenyl)-2-(4-aminostyryl)quinazolin-4(3H)-one (17).</b> This compound was prepared according to the procedure for <b>37</b> from compound <b>1</b> (0.04 g, 0.1 mmol) in 82% yield (0.04 g). $^1\text{H}$ NMR (500 MHz, DMSO- $d_6$ ) $\delta$ 6.00 (d, $J = 15.35$ Hz, 1H), 6.42 (d, $J = 8.57$ Hz, 1H), 6.50 (d, $J = 8.37$ Hz, 2H), 6.71 (s, 1H), 7.04 (d, $J = 8.37$ Hz, 2H), 7.39 (t, $J = 7.78$ Hz, 1H), 7.45 (t, $J = 6.58$ Hz, 1H), 7.68 (d, $J = 8.17$ Hz, 1H), 7.79 (m, 3H), 8.07 (d, $J = 7.78$ Hz, 1H), 9.91 (s, 1H). HRMS ( $m/z$ ): $[\text{M} + \text{H}]^+$ , calcd for $\text{C}_{22}\text{H}_{18}\text{N}_3\text{O}_2$ , 356.1394; found, 356.1392.                                                                                                                                                                                  |
|   | <b>(E)-3-(3-hydroxyphenyl)-2-(4-carboxystyryl)quinazolin-4(3H)-one (18).</b> This compound was prepared according to the procedure for <b>5</b> in 83% yield (0.31 g). $^1\text{H}$ NMR (500 MHz, DMSO- $d_6$ ) $\delta$ 6.49 (d, $J = 15.55$ Hz, 1H), 6.84 (m, 2H), 6.97 (d, $J = 8.37$ Hz, 1H), 7.40 (t, $J = 7.98$ Hz, 1H), 7.49 (d, $J = 8.37$ Hz, 2H), 7.55 (t, $J = 7.98$ Hz, 1H), 7.78 (d, $J = 7.98$ Hz, 1H), 7.90 (m, 4H), 8.14 (d, $J = 7.98$ Hz, 1H), 9.93 (s, 1H). $^{13}\text{C}$ NMR (126 MHz, DMSO- $d_6$ ) $\delta$ 95.45, 115.86, 116.36, 119.30, 120.76, 122.25, 126.49, 126.83, 127.28, 127.56, 129.57, 129.93, 129.99, 130.44, 131.37, 134.79, 137.44, 137.74, 138.95, 147.26, 151.06, 158.32, 161.06, 166.76. HRMS ( $m/z$ ): $[\text{M} + \text{Na}]^+$ , calcd for $\text{C}_{23}\text{H}_{16}\text{N}_2\text{NaO}_4$ , 407.1002; found, 407.1016. |
|  | <b>(E)-3-(3-hydroxyphenyl)-2-styrylquinazolin-4(3H)-one (19).</b> This compound was prepared according to the procedure for <b>5</b> in 27% yield (0.64 g). $^1\text{H}$ NMR (500 MHz, DMSO- $d_6$ ) $\delta$ 5.53 (d, $J = 15.55$ Hz, 1H), 6.00 (m, 2H), 6.12 (d, $J = 8.17$ Hz, 1H), 6.51 (m, 6H), 6.67 (t, $J = 7.58$ Hz, 1H), 6.92 (d, $J = 8.17$ Hz, 1H), 7.02 (m, 2H), 7.27 (d, $J = 7.78$ Hz, 1H), 9.07 (s, 1H). $^{13}\text{C}$ NMR (126 MHz, DMSO- $d_6$ ) $\delta$ 115.84, 116.27, 119.29, 119.99, 120.63, 126.44, 126.55, 127.15, 127.42, 129.07, 129.77, 130.38, 134.70, 134.87, 137.88, 138.64, 147.34, 151.30, 158.33, 161.08. HRMS ( $m/z$ ): $[\text{M} + \text{H}]^+$ , calcd for $\text{C}_{22}\text{H}_{17}\text{N}_2\text{O}_2$ , 341.1285; found, 341.1319.                                                                                          |
|  | <b>(E)-2-(2-(benzo[d][1,3]dioxol-5-yl)vinyl)-3-(3-hydroxyphenyl)quinazolin-4(3H)-one (20).</b> This compound was purchased from ChemDiv.                                                                                                                                                                                                                                                                                                                                                                                                                                                                                                                                                                                                                                                                                                                                  |

|                                                                                     |                                                                                                                                                                                                                                                                                                                                                                                                                                                                                                                                                                                                                                                                                                                                                                                                                                                                                                                                                                                                                                                |
|-------------------------------------------------------------------------------------|------------------------------------------------------------------------------------------------------------------------------------------------------------------------------------------------------------------------------------------------------------------------------------------------------------------------------------------------------------------------------------------------------------------------------------------------------------------------------------------------------------------------------------------------------------------------------------------------------------------------------------------------------------------------------------------------------------------------------------------------------------------------------------------------------------------------------------------------------------------------------------------------------------------------------------------------------------------------------------------------------------------------------------------------|
| 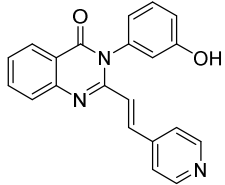   | <p><b>(E)-3-(3-hydroxyphenyl)-2-(2-(pyridine-4-yl)vinyl)quinazolin-4(3H)-one (21).</b> This compound was prepared according to the procedure for <b>5</b> and purified by silica gel column chromatography to give the final product in 43% yield (0.18 g). <sup>1</sup>H NMR (500 MHz, DMSO-<i>d</i><sub>6</sub>) δ 6.60 (d, <i>J</i> = 15.55 Hz, 1H), 6.85 (m, 2H), 6.97 (d, <i>J</i> = 8.37 Hz, 1H), 7.33 (m, 2H), 7.40 (t, <i>J</i> = 7.18 Hz, 1H), 7.57 (t, <i>J</i> = 7.58 Hz, 1H), 7.80 (m, 2H), 7.90 (t, <i>J</i> = 7.38 Hz, 1H), 8.15 (d, <i>J</i> = 7.38 Hz, 1H), 8.56 (m, 2H), 9.94 (s, 1H). <sup>13</sup>C NMR (126 MHz, DMSO-<i>d</i><sub>6</sub>) δ 115.84, 115.93, 116.45, 119.33, 120.89, 121.38, 126.53, 127.05, 127.37, 130.44, 134.82, 135.92, 137.62, 141.93, 147.16, 150.50, 150.72, 158.37, 160.99. HRMS (<i>m/z</i>): [M + H]<sup>+</sup>, calcd for C<sub>21</sub>H<sub>16</sub>N<sub>3</sub>O<sub>2</sub>, 342.1237; found, 342.1251.</p>                                                                             |
|    | <p><b>(E)-3-(3-hydroxyphenyl)-2-(2-(furan-2-yl)vinyl)quinazolin-4(3H)-one (22).</b> This compound was prepared according to the procedure for <b>5</b> in 61% yield (0.16 g). <sup>1</sup>H NMR (500 MHz, DMSO-<i>d</i><sub>6</sub>) δ 6.17 (d, <i>J</i> = 15.35 Hz, 1H), 6.59 (s, 1H), 6.83 (m, 3H), 6.96 (d, <i>J</i> = 8.17 Hz, 1H), 7.39 (t, <i>J</i> = 7.98 Hz, 1H), 7.51 (t, <i>J</i> = 7.38 Hz, 1H), 7.75 (m, 3H), 7.86 (t, <i>J</i> = 8.17 Hz, 1H), 8.10 (d, <i>J</i> = 7.78 Hz, 1H), 9.93 (s, 1H). <sup>13</sup>C NMR (126 MHz, DMSO-<i>d</i><sub>6</sub>) δ 95.45, 112.71, 115.42, 115.82, 116.29, 116.70, 119.30, 120.51, 125.91, 126.40, 126.45, 127.01, 130.48, 134.73, 137.95, 145.49, 147.39, 150.99, 158.34, 161.12. HRMS (<i>m/z</i>): [M + H]<sup>+</sup>, calcd for C<sub>20</sub>H<sub>15</sub>N<sub>2</sub>O<sub>3</sub>, 331.1077; found, 331.1102.</p>                                                                                                                                                                  |
|  | <p><b>(E)-2-(2-cyclohexylvinyl)-3-(3-hydroxyphenyl)quinazolin-4(3H)-one (23).</b> 3-(3-hydroxyphenyl)-2-methylquinazolin-4(3H)-one (0.38 g, 1.5 mmol) and cyclohexanecarboxaldehyde (0.37 g, 3.3 mmol) were dissolved in 250 μL pyridine and heated to 165 °C for 1 h. The reaction mixture was purified by silica gel column chromatography to give the product in 9% yield (0.05 g). <sup>1</sup>H (400 MHz, CDCl<sub>3</sub>) δ 1.07 (m, 6H), 1.66 (s, br, 6H), 2.04 (s, br, 1H), 5.77 (d, <i>J</i> = 15.2 Hz, 1H), 6.60 (m, 2H), 6.83 (d, <i>J</i> = 7.2 Hz, 1H), 7.11 (d, <i>J</i> = 8.0 Hz, 1H), 7.32 (t, <i>J</i> = 7.2 Hz, 1H), 7.44 (s, br, 1H), 7.75 (s, br, 2H), 8.09 (s, 1H), 8.28 (d, <i>J</i> = 7.6 Hz, 1H). <sup>13</sup>C NMR (100 MHz, CDCl<sub>3</sub>) δ 25.8, 26.1, 32.1, 41.3, 116.1, 117.5, 119.4, 120.1, 120.4, 126.8, 127.3, 130.9, 135.1, 137.3, 150.7, 152.4, 158.8, 163.2. HRMS (<i>m/z</i>): [M + H]<sup>+</sup>, calcd for C<sub>22</sub>H<sub>23</sub>N<sub>2</sub>O<sub>2</sub>, 347.1754; found, 347.1785.</p> |
|  | <p><b>3-(3-hydroxyphenyl)-2-phenethylquinazolin-4(3H)-one (24).</b> Compound <b>19</b> (0.6 g, 1.75 mmol) was dissolved in 250 mL of 50:50 EtOAc:EtOH to which Pd/C (0.12 g) was added. The flask was flushed with H<sub>2</sub> and the reaction stirred at 25 °C under H<sub>2</sub> positive pressure overnight (16 h). The reaction was filtered through celite, concentrated <i>in vacuo</i>, and purified by silica gel column chromatography. Recrystallization from hot ethanol was performed to obtain pure product in 29% yield (0.18 g). <sup>1</sup>H</p>                                                                                                                                                                                                                                                                                                                                                                                                                                                                          |



|                                                                                     |                                                                                                                                                                                                                                                                                                                                                                                                                                                                                                                                                                                                                                                                                                                                                                                                                                                                                                                                                                                                                          |
|-------------------------------------------------------------------------------------|--------------------------------------------------------------------------------------------------------------------------------------------------------------------------------------------------------------------------------------------------------------------------------------------------------------------------------------------------------------------------------------------------------------------------------------------------------------------------------------------------------------------------------------------------------------------------------------------------------------------------------------------------------------------------------------------------------------------------------------------------------------------------------------------------------------------------------------------------------------------------------------------------------------------------------------------------------------------------------------------------------------------------|
|                                                                                     | <p>NMR (500 MHz, DMSO-<i>d</i><sub>6</sub>) δ 2.65 (t, <i>J</i> = 8.77 Hz, 2H), 2.99 (t, <i>J</i> = 8.57 Hz, 2H), 6.79 (m, 2H), 6.90 (d, <i>J</i> = 8.17 Hz, 1H), 7.06 (d, <i>J</i> = 6.98 Hz, 2H), 7.14 (t, <i>J</i> = 7.18 Hz, 1H), 7.22 (t, <i>J</i> = 7.58 Hz, 2H), 7.33 (t, <i>J</i> = 7.78 Hz, 1H), 7.53 (t, <i>J</i> = 7.18 Hz, 1H), 7.71 (d, <i>J</i> = 7.58 Hz, 1H), 7.86 (t, <i>J</i> = 7.18 Hz, 1H), 8.11 (d, <i>J</i> = 7.98 Hz, 1H), 9.85 (s, 1H). <sup>13</sup>C NMR (126 MHz, DMSO-<i>d</i><sub>6</sub>) δ 32.17, 37.03, 95.43, 115.61, 116.02, 118.97, 120.55, 126.02, 126.32, 126.54, 126.88, 128.18, 128.35, 130.21, 134.58, 138.13, 147.10, 156.01, 158.26, 161.20. HRMS (<i>m/z</i>): [M + H]<sup>+</sup>, calcd for C<sub>22</sub>H<sub>19</sub>N<sub>2</sub>O<sub>2</sub>, 343.1441; found, 343.1454.</p>                                                                                                                                                                                          |
| 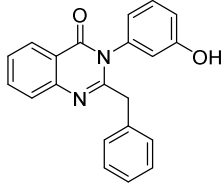   | <p><b>2-benzyl-3-(3-hydroxyphenyl)quinazolin-4(3H)-one (25).</b><br/>This compound was purchased from ChemDiv.</p>                                                                                                                                                                                                                                                                                                                                                                                                                                                                                                                                                                                                                                                                                                                                                                                                                                                                                                       |
|    | <p><b>3-(3-hydroxyphenyl)-2-(4-tolyl)quinazolin-4(3H)-one (26).</b><br/>This compound was purchased from ChemDiv.</p>                                                                                                                                                                                                                                                                                                                                                                                                                                                                                                                                                                                                                                                                                                                                                                                                                                                                                                    |
|  | <p><b>(E)-3-(3-carboxyphenyl)-2-(4-ethynylstyryl)quinazolin-4(3H)-one (27).</b> This compound was prepared according to the procedure for <b>2</b> and purified by silica gel column chromatography in 24% yield (0.05 g). <sup>1</sup>H NMR (600 MHz, CD<sub>3</sub>OD) δ 3.60 (s, 1H), 6.38 (d, <i>J</i> = 15.55 Hz, 1H), 7.29 (d, <i>J</i> = 8.57 Hz, 2H), 7.39 (d, <i>J</i> = 8.17 Hz, 2H), 7.54 (t, <i>J</i> = 6.98 Hz, 1H), 7.64 (d, <i>J</i> = 7.98 Hz, 1H), 7.76 (t, <i>J</i> = 7.98 Hz, 1H), 7.82 (d, <i>J</i> = 8.17 Hz, 1H), 7.88 (m, 2H), 8.07 (s, 1H), 8.20 (d, <i>J</i> = 7.78 Hz, 1H), 8.25 (d, <i>J</i> = 7.78 Hz, 1H). <sup>13</sup>C NMR (126 MHz, DMSO-<i>d</i><sub>6</sub>) δ 82.70, 83.24, 120.66, 121.04, 122.84, 126.51, 126.81, 127.31, 127.83, 129.98, 130.12, 132.33, 132.39, 133.49, 134.90, 135.21, 137.21, 137.99, 147.36, 151.04, 161.37, 166.58. HRMS (<i>m/z</i>): [M + H]<sup>+</sup>, calcd for C<sub>25</sub>H<sub>17</sub>N<sub>2</sub>O<sub>3</sub>, 393.1234; found, 393.1250.</p> |
|  | <p><b>(E)-3-(3-carboxyphenyl)-2-(4-(3-hydroxyprop-1-yn-1-yl)styryl)quinazolin-4(3H)-one (28).</b> 1 M NaOH solution (aq, 0.5 mL) was added to a solution of <b>29</b> (100 mg, 0.25 mmol) in 0.5 mL ethanol and stirred for 2 h at room temperature. Water (3 mL) was added and the resulting solution acidified with 3 M HCl (aq). Extraction with dichloromethane followed and the organic layer dried over Na<sub>2</sub>SO<sub>4</sub> and concentrated <i>in vacuo</i> to yield pure product in 73% yield (0.068 g). <sup>1</sup>H (400 MHz, DMSO-<i>d</i><sub>6</sub>) δ 4.29 (s, 2H), 6.34 (d, <i>J</i> = 15.6 Hz, 1H), 7.40 (m, 4H), 7.55 (ddd, <i>J</i> = 7.6, 7.2, 1.2 Hz, 1H), 7.74 (m, 2H), 7.78 (d, <i>J</i> = 8 Hz, 1H), 7.88 (d, <i>J</i> = 15.6 Hz, 1H), 7.89 (ddd, <i>J</i> = 8.0, 7.2, 1.6 Hz, 1H), 8.02 (m, 1H), 8.13 (m, 2H). <sup>13</sup>C NMR (101 MHz,</p>                                                                                                                                       |

|                                                                                     |                                                                                                                                                                                                                                                                                                                                                                                                                                                                                                                                                                                                                                                                                                                                                                                                                                                                                                                                                 |
|-------------------------------------------------------------------------------------|-------------------------------------------------------------------------------------------------------------------------------------------------------------------------------------------------------------------------------------------------------------------------------------------------------------------------------------------------------------------------------------------------------------------------------------------------------------------------------------------------------------------------------------------------------------------------------------------------------------------------------------------------------------------------------------------------------------------------------------------------------------------------------------------------------------------------------------------------------------------------------------------------------------------------------------------------|
|                                                                                     | DMSO- <i>d</i> <sub>6</sub> δ 50.18, 84.06, 92.61, 121.32, 121.41, 124.33, 127.17, 127.45, 127.95, 128.52 (2C), 130.63, 130.77 (2C), 132.53 (2C), 133.09, 134.15, 135.41, 135.55, 137.88, 138.80, 148.03, 151.77, 162.02, 167.20. HRMS ( <i>m/z</i> ): [M + H] <sup>+</sup> , calcd for C <sub>26</sub> H <sub>19</sub> N <sub>2</sub> O <sub>4</sub> , 423.1339; found, 423.1349.                                                                                                                                                                                                                                                                                                                                                                                                                                                                                                                                                              |
| 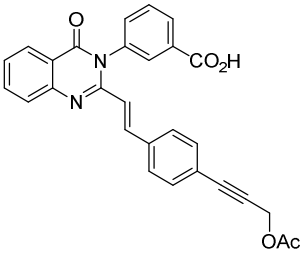   | <b>(E)-3-(3-carboxyphenyl)-2-(4-(3-acetoxyprop-1-yn-1-yl)styryl)quinazolin-4(3H)-one (29).</b> The compound was prepared according to the procedure described previously in 79% yield (0.367 g). <sup>1</sup> <sup>1</sup> H (600 MHz, DMSO- <i>d</i> <sub>6</sub> ) δ 2.07 (s, 3H), 4.92 (s, 2H), 6.36 (d, <i>J</i> = 15.6 Hz, 1H), 7.40 (m, 4H), 7.54 (t, <i>J</i> = 7.8 Hz, 1H), 7.75 (m, 2H), 7.79 (d, <i>J</i> = 7.8 Hz, 1H), 7.89 (m, 2H), 8.03 (s, 1H), 8.13 (m, 2H), 13.28 (s, 1H). <sup>13</sup> C NMR (151 MHz, DMSO- <i>d</i> <sub>6</sub> ) δ 20.47, 52.22, 85.34, 85.99, 120.63, 121.05, 122.46, 126.46, 126.75, 127.26, 127.84 (2C), 129.94, 130.05, 130.07, 132.09 (2C), 132.35, 133.44, 134.83, 135.27, 137.15, 137.89, 147.31, 150.98, 161.30, 166.50, 169.73. HRMS ( <i>m/z</i> ): [M + H] <sup>+</sup> , calcd for C <sub>28</sub> H <sub>21</sub> N <sub>2</sub> O <sub>5</sub> , 465.1445; found, 465.1421.                |
|   | <b>(E)-3-(3-carboxyphenyl)-2-(4-fluorostyryl)quinazolin-4(3H)-one (30).</b> This compound was prepared according to the procedure described previously in 76% yield (0.69 g). <sup>1</sup> <sup>1</sup> H NMR (500 MHz, DMSO- <i>d</i> <sub>6</sub> ) δ 6.25 (d, <i>J</i> = 15.55 Hz, 1H), 7.19 (m, 2H), 7.46 (m, 2H), 7.55 (d, <i>J</i> = 8.17 Hz, 1H), 7.73 (m, 2H), 7.77 (d, <i>J</i> = 8.17 Hz, 1H), 7.87 (m, 2H), 8.02 (s, 1H), 8.13 (m, 2H). <sup>13</sup> C NMR (126 MHz, DMSO- <i>d</i> <sub>6</sub> ) δ 115.91, 116.20, 119.77, 120.59, 126.48, 126.66, 127.21, 129.82, 129.93, 130.06, 131.39, 131.44, 132.34, 133.49, 134.84, 137.25, 137.79, 147.39, 151.15, 161.35, 166.55. HRMS ( <i>m/z</i> ): [M + H] <sup>+</sup> , calcd for C <sub>23</sub> H <sub>16</sub> N <sub>2</sub> O <sub>3</sub> , 387.1139; found, 387.1140.                                                                                                       |
|  | <b>(E)-3-(3-carboxyphenyl)-2-(3,4-difluorostyryl)quinazolin-4(3H)-one (31).</b> This compound was prepared according to the procedure described previously in 37% yield (0.19 g). <sup>1</sup> <sup>1</sup> H (500 MHz, DMSO- <i>d</i> <sub>6</sub> ) δ 6.34 (d, <i>J</i> = 15.5 Hz, 1H), 7.28 (s, br, 1H), 7.41 (q, <i>J</i> = 8.5 Hz, 1H), 7.53 (m, 2H), 7.71 (m, 2H), 7.78 (d, <i>J</i> = 8.0 Hz, 1H), 7.84 (d, 16.0 Hz, 1H), 7.87 (m, 1H), 8.01 (s, br, 1H), 8.12 (m, 2H). <sup>13</sup> C NMR (126 MHz, DMSO- <i>d</i> <sub>6</sub> ) δ 117.2, 117.4, 118.7, 118.8, 121.3, 122.1, 125.3, 125.4(3C), 127.2, 127.5, 127.9, 130.6, 130.7 (2C), 133.0, 133.3, 133.4 (4C), 135.5, 137.4, 137.7, 148.0, 149.3, 149.4, 149.7, 149.8, 151.2, 151.3, 151.7, 151.8, 162.0, 167.2. HRMS ( <i>m/z</i> ): [M + Na] <sup>+</sup> , calcd for C <sub>23</sub> H <sub>14</sub> F <sub>2</sub> N <sub>2</sub> NaO <sub>3</sub> , 427.0865; found, 427.0863. |
|  | <b>(E)-3-(3-carboxyphenyl)-2-(3-chloro-4-fluorostyryl)quinazolin-4(3H)-one (32).</b> This compound was prepared according to the procedure described previously in 43% yield (0.23 g). <sup>1</sup> <sup>1</sup> H (500 MHz, DMSO- <i>d</i> <sub>6</sub> ) δ 6.34 (d, <i>J</i> = 15.5 Hz, 1H), 7.35 (m, 2H), 7.54 (t, <i>J</i> = 7.5 Hz, 1H), 7.71 (m, 4H), 7.82 (m, 2H), 8.02 (s, 1H), 8.12 (d, <i>J</i> = 8.0 Hz, 2H). <sup>13</sup> C                                                                                                                                                                                                                                                                                                                                                                                                                                                                                                        |

|                                                                                     |                                                                                                                                                                                                                                                                                                                                                                                                                                                                                                                                                                                                                                                                                                                                                                                                                                                                                                                                                                                                                                    |
|-------------------------------------------------------------------------------------|------------------------------------------------------------------------------------------------------------------------------------------------------------------------------------------------------------------------------------------------------------------------------------------------------------------------------------------------------------------------------------------------------------------------------------------------------------------------------------------------------------------------------------------------------------------------------------------------------------------------------------------------------------------------------------------------------------------------------------------------------------------------------------------------------------------------------------------------------------------------------------------------------------------------------------------------------------------------------------------------------------------------------------|
|                                                                                     | NMR (126 MHz, DMSO- <i>d</i> <sub>6</sub> ) δ 118.1, 118.3, 120.8, 120.9, 121.3, 122.1, 127.1, 127.5, 127.9, 128.6, 128.7, 130.6, 130.7, 133.0, 133.6 (2C), 134.1, 135.5, 137.1, 137.7, 147.9, 151.7, 157.3, 159.3, 161.9, 167.2. HRMS ( <i>m/z</i> ): [M + H] <sup>+</sup> , calcd for C <sub>23</sub> H <sub>15</sub> FCIN <sub>2</sub> O <sub>3</sub> , 421.0750; found, 421.0751.                                                                                                                                                                                                                                                                                                                                                                                                                                                                                                                                                                                                                                              |
| 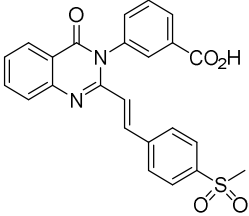   | <b>(E)-3-(3-carboxyphenyl)-2-(4-(methylsulfonyl)styryl)quinazolin-4(3H)-one (33).</b> This compound was prepared according to the procedure described previously in 46% yield (0.26 g). <sup>1</sup> H NMR (500 MHz, DMSO- <i>d</i> <sub>6</sub> ) δ 3.19 (s, 3H), 6.49 (d, <i>J</i> = 15.5 Hz, 1H), 7.57 (t, <i>J</i> = 8.0 Hz, 1H), 7.66 (d, <i>J</i> = 8.0 Hz, 2H), 7.74 (m, 2H), 7.81 (d, <i>J</i> = 8.0 Hz, 1H), 7.86 (m, 4H), 8.05 (s, br, 1H), 8.12 (m, 2H). <sup>13</sup> C NMR (100 MHz, DMSO- <i>d</i> <sub>6</sub> ) δ 44.0, 121.4, 124.1, 127.2, 127.7, 128.0, 128.3, 128.9, 130.6, 130.7, 130.8, 133.0, 134.1, 135.5, 137.6, 137.7, 140.3, 141.7, 147.9, 151.5, 161.9, 167.2. HRMS ( <i>m/z</i> ): [M + H] <sup>+</sup> , calcd for C <sub>24</sub> H <sub>19</sub> N <sub>2</sub> O <sub>5</sub> S, 447.1009; found, 447.1029.                                                                                                                                                                                       |
|   | <b>(E)-3-(3-carboxyphenyl)-2-(4-(2-methoxyethoxy)styryl)quinazolin-4(3H)-one (34).</b> The compound was prepared according to the procedure described previously in 85% yield (0.374 g). <sup>1</sup> H NMR (600 MHz, DMSO- <i>d</i> <sub>6</sub> ) δ 3.59 (s, 3H), 3.67 (s, 2H), 6.29 (d, <i>J</i> = 15.6 Hz, 1H), 7.24 (d, <i>J</i> = 7.8 Hz, 2H), 7.33 (d, <i>J</i> = 7.8 Hz, 2H), 7.54 (ddd, <i>J</i> = 8.4, 7.8, 1.2 Hz, 1H), 7.74 (m, 2H), 7.79 (d, <i>J</i> = 7.8 Hz, 1H), 7.87 (d, <i>J</i> = 15.6 Hz, 1H), 7.88 (ddd, <i>J</i> = 8.4, 7.8, 1.2 Hz, 1H), 8.02 (m, 1H), 8.13 (m, 2H), 13.13 (s, 1H). <sup>13</sup> C NMR (151 MHz, DMSO- <i>d</i> <sub>6</sub> ) δ 39.86, 51.74, 119.70, 120.57, 126.44, 126.59, 127.20, 127.60 (2C), 129.92, 130.00, 130.02, 130.05 (2C), 132.33, 133.42, 133.44, 134.80, 136.22, 137.25, 138.68, 147.39, 151.21, 161.33, 166.50, 171.22. HRMS ( <i>m/z</i> ): [M + H] <sup>+</sup> , calcd for C <sub>26</sub> H <sub>21</sub> N <sub>2</sub> O <sub>5</sub> , 441.1445; found, 441.1475. |
|  | <b>(E)-3-(2-hydroxyphenyl)-2-(4-nitrostyryl)quinazolin-4(3H)-one (35).</b> This compound was prepared according to the procedure for <b>5</b> in 22% yield (0.05 g). <sup>1</sup> H NMR (500 MHz, DMSO- <i>d</i> <sub>6</sub> ) δ 6.59 (d, <i>J</i> = 15.55 Hz, 1H), 7.02 (t, <i>J</i> = 6.98 Hz, 1H), 7.41 (t, <i>J</i> = 7.98 Hz, 1H), 7.57 (t, <i>J</i> = 7.58 Hz, 1H), 7.64 (d, <i>J</i> = 7.38 Hz, 2H), 7.79 (d, <i>J</i> = 7.78 Hz, 1H), 7.90 (t, <i>J</i> = 7.18 Hz, 1H), 8.15 (d, <i>J</i> = 7.58 Hz, 1H), 8.20 (d, <i>J</i> = 6.78 Hz, 2H), 10.05 (s, 1H). <sup>13</sup> C NMR (126 MHz, DMSO- <i>d</i> <sub>6</sub> ) δ 116.79, 119.77, 120.96, 123.52, 123.85, 124.24, 126.49, 127.29, 128.43, 130.07, 130.82, 134.80, 141.30, 147.25, 147.52, 151.36, 153.13, 160.84, 162.38. HRMS ( <i>m/z</i> ): [M + H] <sup>+</sup> , calcd for C <sub>22</sub> H <sub>16</sub> N <sub>3</sub> O <sub>4</sub> , 386.1135; found, 386.1159.                                                                                         |

|                                                                                     |                                                                                                                                                                                                                                                                                                                                                                                                                                                                                                                                                                                                                                                                                                                                                                                                                                                                                                                                                                                                                                                                                                                                                                                                                                                                                               |
|-------------------------------------------------------------------------------------|-----------------------------------------------------------------------------------------------------------------------------------------------------------------------------------------------------------------------------------------------------------------------------------------------------------------------------------------------------------------------------------------------------------------------------------------------------------------------------------------------------------------------------------------------------------------------------------------------------------------------------------------------------------------------------------------------------------------------------------------------------------------------------------------------------------------------------------------------------------------------------------------------------------------------------------------------------------------------------------------------------------------------------------------------------------------------------------------------------------------------------------------------------------------------------------------------------------------------------------------------------------------------------------------------|
| 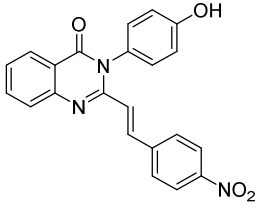   | <p><b>(E)-3-(4-hydroxyphenyl)-2-(4-nitrostyryl)quinazolin-4(3H)-one (36).</b> This compound was prepared according to the procedure for <b>5</b> in 13% yield (0.02 g). <sup>1</sup>H NMR (500 MHz, DMSO-<i>d</i><sub>6</sub>) δ 6.59 (d, <i>J</i> = 15.55 Hz, 1H), 6.94 (d, <i>J</i> = 6.38 Hz, 2H), 7.23 (d, <i>J</i> = 6.58 Hz, 2H), 7.55 (t, <i>J</i> = 6.58 Hz, 1H), 7.65 (d, <i>J</i> = 6.98 Hz, 2H), 7.77 (d, <i>J</i> = 7.98 Hz, 1H), 7.88 (t, <i>J</i> = 6.78 Hz, 1H), 7.92 (d, <i>J</i> = 15.55 Hz, 1H), 8.12 (d, <i>J</i> = 7.18 Hz, 1H), 8.19 (d, <i>J</i> = 7.58 Hz, 2H). <sup>13</sup>C NMR (126 MHz, DMSO-<i>d</i><sub>6</sub>) δ 116.15, 120.83, 124.22, 124.45, 126.52, 126.97, 127.31, 127.56, 128.49, 129.90, 134.76, 136.01, 141.35, 147.16, 147.48, 151.44, 157.85, 161.39. HRMS (<i>m/z</i>): [M + H]<sup>+</sup>, calcd for C<sub>22</sub>H<sub>16</sub>N<sub>3</sub>O<sub>4</sub>, 386.1135; found, 386.1118.</p>                                                                                                                                                                                                                                                                                                                                                     |
|   | <p><b>(E)-3-(3-acetyloxyphenyl)-2-(4-nitrostyryl)quinazolin-4(3H)-one (37).</b> 3-(3-hydroxyphenyl)-2-methylquinazolin-4(3H)-one (0.1 g, 0.4 mmol) and 4-nitrobenzaldehyde (0.08 g, 0.53 mmol) were suspended in 4 mL glacial acetic acid. To the reaction mixture, sodium acetate (0.05 g, 0.65 mmol) and acetic anhydride (400 μL, 3 mmol) were added. The suspension was heated to dissolve the components, refluxed overnight (18 h), and the resulting precipitate was filtered and purified by silica gel column chromatography in 61% yield (0.12 g). <sup>1</sup>H NMR (500 MHz, CDCl<sub>3</sub>) δ 2.32 (s, 3H), 6.60 (d, <i>J</i> = 15.35 Hz, 1H), 7.16 (s, 1H), 7.23 (d, <i>J</i> = 7.98 Hz, 1H), 7.32 (d, <i>J</i> = 8.17 Hz, 1H), 7.51 (m, 3H), 7.62 (t, <i>J</i> = 7.98 Hz, 1H), 7.81 (m, 2H), 7.98 (d, <i>J</i> = 15.35 Hz, 1H), 8.16 (d, <i>J</i> = 8.77 Hz, 1H), 8.30 (d, <i>J</i> = 8.18 Hz, 1H). <sup>13</sup>C NMR (126 MHz, CDCl<sub>3</sub>) δ 21.11, 121.00, 122.75, 122.93, 123.76, 124.12, 126.20, 127.25, 127.33, 127.63, 128.44, 130.75, 134.93, 137.28, 137.36, 141.39, 147.41, 147.97, 150.41, 151.54, 161.83, 169.11. HRMS (<i>m/z</i>): [M + H]<sup>+</sup>, calcd for C<sub>24</sub>H<sub>18</sub>N<sub>3</sub>O<sub>5</sub>, 428.1241; found, 428.1238.</p> |
|  | <p><b>(E)-3-(4-acetyloxyphenyl)-2-(4-nitrostyryl)quinazolin-4(3H)-one (38).</b> This compound was prepared according to the procedure for <b>37</b> in 32% yield (0.05 g). <sup>1</sup>H NMR (500 MHz, CDCl<sub>3</sub>) δ 2.38 (s, 3H), 6.51 (d, <i>J</i> = 15.35 Hz, 1H), 7.36 (m, 4H), 7.46 (d, <i>J</i> = 8.77 Hz, 2H), 7.52 (t, <i>J</i> = 7.78 Hz, 1H), 7.81 (m, 2H), 7.96 (d, <i>J</i> = 15.35 Hz, 1H), 8.17 (d, <i>J</i> = 8.57 Hz, 2H), 8.30 (d, <i>J</i> = 7.78 Hz, 1H). <sup>13</sup>C NMR (126 MHz, CDCl<sub>3</sub>) δ 21.42, 121.22, 123.49, 124.07, 124.37, 127.45, 127.55, 127.80, 128.54, 129.98, 134.08, 135.11, 137.36, 141.49, 147.61, 148.18, 150.84, 151.48, 162.21, 169.18. HRMS (<i>m/z</i>): [M + H]<sup>+</sup>, calcd for C<sub>24</sub>H<sub>18</sub>N<sub>3</sub>O<sub>5</sub>, 428.1241; found, 428.1224.</p>                                                                                                                                                                                                                                                                                                                                                                                                                                                   |

|                                                                                     |                                                                                                                                                                                                                                                                                                                                                                                                                                                                                                                                                                                                                                                                                                                                                                                                                                                                                                                                                                                                                                                                                                                                                                                                                                                                                                                                                                                                                                                                                                                                                                                                                                                                                     |
|-------------------------------------------------------------------------------------|-------------------------------------------------------------------------------------------------------------------------------------------------------------------------------------------------------------------------------------------------------------------------------------------------------------------------------------------------------------------------------------------------------------------------------------------------------------------------------------------------------------------------------------------------------------------------------------------------------------------------------------------------------------------------------------------------------------------------------------------------------------------------------------------------------------------------------------------------------------------------------------------------------------------------------------------------------------------------------------------------------------------------------------------------------------------------------------------------------------------------------------------------------------------------------------------------------------------------------------------------------------------------------------------------------------------------------------------------------------------------------------------------------------------------------------------------------------------------------------------------------------------------------------------------------------------------------------------------------------------------------------------------------------------------------------|
| 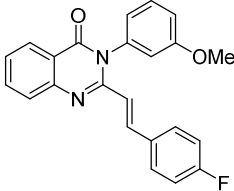   | <p><b>(E)-3-(3-methoxyphenyl)-2-(4-nitrostyryl)quinazolin-4(3H)-one (39).</b> This compound was prepared according to the procedure for <b>5</b> in 52% yield (0.37 g). <sup>1</sup>H NMR (500 MHz, CDCl<sub>3</sub>) δ 3.86 (s, 3H), 6.34 (d, <i>J</i> = 15.55 Hz, 1H), 6.87 (s, 1H), 6.90 (d, <i>J</i> = 7.58 Hz, 1H), 7.02 (t, <i>J</i> = 8.57 Hz, 2H), 7.10 (d, <i>J</i> = 8.37 Hz, 1H), 7.33 (m, 2H), 7.49 (m, 2H), 7.80 (m, 2H), 7.95 (d, <i>J</i> = 15.75 Hz, 1H), 8.31 (d, <i>J</i> = 7.98 Hz, 1H). <sup>13</sup>C NMR (126 MHz, CDCl<sub>3</sub>) δ 55.78, 114.37, 115.65, 116.00, 116.30, 119.74, 119.78, 121.03, 121.13, 126.90, 127.40, 127.55, 129.80, 129.91, 130.92, 131.75, 134.90, 138.86, 147.94, 151.74, 160.98, 162.44, 165.35. HRMS (<i>m/z</i>): [M + H]<sup>+</sup>, calcd for C<sub>23</sub>H<sub>18</sub>FN<sub>2</sub>O<sub>2</sub>, 373.1347; found, 373.1335.</p>                                                                                                                                                                                                                                                                                                                                                                                                                                                                                                                                                                                                                                                                                                                                                                                       |
|    | <p><b>(E)-3-(3-nitrophenyl)-2-(4-nitrostyryl)quinazolin-4(3H)-one (40).</b> This compound was prepared according to the procedure for <b>5</b> in 68% yield (1.87 g). <sup>1</sup>H NMR (500 MHz, DMSO-<i>d</i><sub>6</sub>) δ 6.31 (d, <i>J</i> = 15.35 Hz, 1H), 7.18 (t, <i>J</i> = 8.77 Hz, 2H), 7.55 (m, 3H), 7.80 (d, <i>J</i> = 8.17 Hz, 1H), 7.89 (m, 3H), 7.95 (d, <i>J</i> = 7.38 Hz, 1H), 8.13 (d, <i>J</i> = 7.98 Hz, 1H), 8.43 (d, <i>J</i> = 8.37 Hz, 1H), 8.51 (s, 1H). <sup>13</sup>C NMR (126 MHz, DMSO-<i>d</i><sub>6</sub>) δ 116.01, 116.18, 119.84, 120.70, 124.42, 124.89, 126.64, 126.86, 127.39, 130.32, 130.39, 131.15, 131.53, 131.56, 135.12, 136.11, 138.19, 138.34, 147.54, 148.73, 151.16, 161.54, 162.06, 164.03. HRMS (<i>m/z</i>): [M + H]<sup>+</sup>, calcd for C<sub>22</sub>H<sub>15</sub>FN<sub>3</sub>O<sub>3</sub>, 388.1092; found, 388.1117.</p>                                                                                                                                                                                                                                                                                                                                                                                                                                                                                                                                                                                                                                                                                                                                                                                           |
|  | <p><b>(E)-3-(3-aminophenyl)-2-(4-nitrostyryl)quinazolin-4(3H)-one (41).</b> Compound <b>40</b> (1.80 g, 4.6 mmol) and tin (II) chloride dihydrate (5.24 g, 23.2 mmol) were suspended in 50 mL ethanol to which 1 mL concentrated HCl was added. The solution was refluxed for 3 h and then allowed to stir overnight at 25 °C. The solution was concentrated <i>in vacuo</i> and EtOAc was added to completely dissolve the residue. The EtOAc solution was then neutralized with a NaOH solution and washed with saturated potassium fluoride. The mixture was then filtered through a bed of celite to remove the tin precipitate. The resulting filtrate was washed three times with a saturated KF solution and the EtOAc layer was dried with MgSO<sub>4</sub> and concentrated <i>in vacuo</i>. The residue was then purified by silica gel chromatography (EtOAc/hexanes) to give the product in 32% yield (0.54 g). <sup>1</sup>H NMR (500 MHz, DMSO-<i>d</i><sub>6</sub>) δ 5.46 (s, 2H), 6.38 (d, <i>J</i> = 15.55 Hz, 1H), 6.50 (d, <i>J</i> = 7.58 Hz, 1H), 6.54 (s, 1H), 6.73 (d, <i>J</i> = 8.17 Hz, 1H), 7.23 (m, 3H), 7.43 (m, 2H), 7.52 (t, <i>J</i> = 7.18 Hz, 1H), 7.74 (d, <i>J</i> = 7.78 Hz, 1H), 7.85 (d, <i>J</i> = 7.38 Hz, 1H), 7.87 (d, <i>J</i> = 15.75 Hz, 1H), 8.12 (d, <i>J</i> = 7.98 Hz, 1H). <sup>13</sup>C NMR (126 MHz, DMSO-<i>d</i><sub>6</sub>) δ 113.50, 114.48, 115.42, 116.05, 116.23, 119.95, 120.62, 126.45, 126.55, 127.12, 129.57, 129.64, 129.99, 131.58, 131.60, 134.69, 137.33, 137.53, 147.32, 150.05, 151.35, 161.03, 163.77. HRMS (<i>m/z</i>): [M + H]<sup>+</sup>, calcd for C<sub>22</sub>H<sub>17</sub>FN<sub>3</sub>O,</p> |

|                                                                                     |                                                                                                                                                                                                                                                                                                                                                                                                                                                                                                                                                                                                                                                                                                                                                                                                                                                                                                                                                                                                                                                                                                                                                                                                                                |
|-------------------------------------------------------------------------------------|--------------------------------------------------------------------------------------------------------------------------------------------------------------------------------------------------------------------------------------------------------------------------------------------------------------------------------------------------------------------------------------------------------------------------------------------------------------------------------------------------------------------------------------------------------------------------------------------------------------------------------------------------------------------------------------------------------------------------------------------------------------------------------------------------------------------------------------------------------------------------------------------------------------------------------------------------------------------------------------------------------------------------------------------------------------------------------------------------------------------------------------------------------------------------------------------------------------------------------|
|                                                                                     | 358.1350; found, 358.1360.                                                                                                                                                                                                                                                                                                                                                                                                                                                                                                                                                                                                                                                                                                                                                                                                                                                                                                                                                                                                                                                                                                                                                                                                     |
| 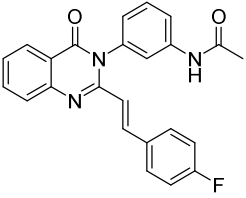   | <p><b>(E)-3-(3-(acetamido)phenyl)-2-(4-fluorostyryl)quinazolin-4(3H)-one (42).</b> Compound <b>41</b> (0.15 g, 0.42 mmol) was dissolved in 4 mL pyridine, to which acetic anhydride was added (0.21 g, 2.1 mmol). The reaction was stirred for 3 h at 25 °C and then refluxed for 1 h. The reaction was then poured over ice in 2M HCl and the resulting precipitate was filtered out and washed with cold water to give the product in 83% yield (0.15 g). <sup>1</sup>H (500 MHz, DMSO-<i>d</i><sub>6</sub>) δ 2.06 (s, 3H), 6.30 (d, <i>J</i> = 15.55 Hz, 1H), 7.12 (d, <i>J</i> = 7.38 Hz, 1H), 7.22 (t, <i>J</i> = 8.77 Hz, 1H), 7.46 (m, 2H), 7.55 (m, 2H), 7.73 (d, <i>J</i> = 6.58 Hz, 2H), 7.82 (d, <i>J</i> = 7.98 Hz, 1H), 7.90 (t, <i>J</i> = 6.78 Hz, 1H), 7.93 (d, <i>J</i> = 15.75 Hz, 1H), 8.13 (d, <i>J</i> = 7.98 Hz, 1H), 10.33 (s, 1H). <sup>13</sup>C NMR (126 MHz, DMSO-<i>d</i><sub>6</sub>) δ 24.09, 111.17, 116.12, 116.30, 118.45, 118.87, 119.70, 120.31, 123.21, 126.64, 127.10, 127.41, 130.03, 135.13, 136.70, 140.61, 141.61, 158.28, 160.81, 168.78. HRMS (<i>m/z</i>): [M + H]<sup>+</sup>, calcd for C<sub>24</sub>H<sub>19</sub>FN<sub>3</sub>O<sub>2</sub>, 400.1456; found, 400.1440.</p> |
|  | <p><b>(E)-3-(3-(methylsulfonamido)phenyl)-2-(4-fluorostyryl)quinazolin-4(3H)-one (43).</b> Compound <b>41</b> (0.15 g, 0.42 mmol) was dissolved in 4 mL pyridine and cooled to 0 °C, to which mesyl chloride (0.24 g, 2.1 mmol) was added. The reaction was stirred at 25 °C for 3 h and then poured over ice in 2M HCl. The resulting precipitate was filtered out and washed with cold 2M HCl followed by cold water to give the product in 99% yield (0.19 g). <sup>1</sup>H (500 MHz, DMSO-<i>d</i><sub>6</sub>) δ 3.05 (s, 3H), 6.31 (d, <i>J</i> = 15.75 Hz, 1H), 7.22 (m, 3H), 7.33 (s, 1H), 7.42 (d, <i>J</i> = 8.17 Hz, 2H), 7.48 (m, 2H), 7.58 (t, <i>J</i> = 7.98 Hz, 2H), 7.92 (d, <i>J</i> = 3.59 Hz, 2H), 7.99 (d, <i>J</i> = 15.75 Hz, 1H), 7.8.12 (m, 2H), 10.20 (s, 1H). <sup>13</sup>C NMR (126 MHz, DMSO-<i>d</i><sub>6</sub>) δ 54.50, 115.94, 116.11, 118.14, 119.37, 120.08, 120.27, 123.88, 126.52, 127.01, 127.27, 129.92, 129.99, 130.43, 135.05, 139.56, 141.42, 146.46, 160.54, 161.94. HRMS (<i>m/z</i>): [M + H]<sup>+</sup>, calcd for C<sub>23</sub>H<sub>19</sub>FN<sub>3</sub>O<sub>3</sub>S, 436.1126; found, 436.1136.</p>                                                                  |
|  | <p><b>(E)-3-(3-carbomylphenyl)-2-(4-fluorostyryl)quinazolin-4(3H)-one (44).</b> This compound was prepared according to the procedure for <b>5</b> in 13% yield (0.15 g). <sup>1</sup>H (500 MHz, DMSO-<i>d</i><sub>6</sub>) δ 6.25 (d, <i>J</i> = 15.31 Hz, 1H), 7.20 (t, <i>J</i> = 8.85 Hz, 2H), 7.45 (m, 2H), 7.56 (t, <i>J</i> = 6.70 Hz, 2H), 7.68 (m, 2H), 7.78 (d, <i>J</i> = 8.37 Hz, 1H), 7.93 (m, 3H), 8.09 (m, 2H), 8.13 (d, <i>J</i> = 8.13 Hz, 1H), 11.98 (br. s, 1H). <sup>13</sup>C NMR (126 MHz, DMSO-<i>d</i><sub>6</sub>) δ 115.61, 116.01, 116.18, 120.51, 126.49, 127.24, 128.12, 128.31, 129.80, 129.87, 131.86, 134.93, 135.72, 136.98, 146.94, 147.36, 151.21, 161.34, 161.86, 166.76, 172.08. HRMS (<i>m/z</i>): [M + Na]<sup>+</sup>, calcd for C<sub>23</sub>H<sub>16</sub>FN<sub>3</sub>NaO<sub>2</sub>, 408.1119; found, 408.1098.</p>                                                                                                                                                                                                                                                                                                                                                            |

|                                                                                     |                                                                                                                                                                                                                                                                                                                                                                                                                                                                                                                                                                                                                                                                                                                                                                                                                                                                                                                                                                                                                                                                                                                                                                                                                                                                                                                                                                                                                              |
|-------------------------------------------------------------------------------------|------------------------------------------------------------------------------------------------------------------------------------------------------------------------------------------------------------------------------------------------------------------------------------------------------------------------------------------------------------------------------------------------------------------------------------------------------------------------------------------------------------------------------------------------------------------------------------------------------------------------------------------------------------------------------------------------------------------------------------------------------------------------------------------------------------------------------------------------------------------------------------------------------------------------------------------------------------------------------------------------------------------------------------------------------------------------------------------------------------------------------------------------------------------------------------------------------------------------------------------------------------------------------------------------------------------------------------------------------------------------------------------------------------------------------|
| 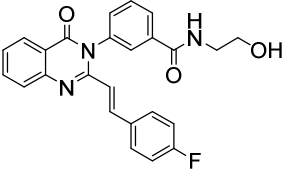   | <p><b>(E)-3-(3-(2-hydroxyethyl)carbonylphenyl)-2-(4-fluorostyryl)quinazolin-4(3H)-one (45).</b> Compound <b>30</b> (0.19 g, 0.5 mmol) was dissolved in 12 mL THF, to which 2-aminoethanol (0.037 g, 0.6 mmol), HOBt (0.074 g, 0.55 mmol), and DIC (0.069 g, 0.55 mmol) were added. The mixture was stirred at room temperature for 8 h and 25 mL EtOAc was added and washed with saturated NH<sub>4</sub>Cl. The organic phase was dried over Na<sub>2</sub>SO<sub>4</sub>, concentrated <i>in vacuo</i>, and purified by silica gel column chromatography to give the product in 69% yield (0.15 g). <sup>1</sup>H (400 MHz, DMSO-<i>d</i><sub>6</sub>) δ 3.28 (m, 2H), 3.49 (m, 2H), 4.75 (d, <i>J</i> = 5.6 Hz, 1H), 6.28 (d, <i>J</i> = 15.6 Hz, 1H), 7.20 (d, <i>J</i> = 8.8 Hz, 2H), 7.43 (m, 2H), 7.53 (m, 1H), 7.64 (d, <i>J</i> = 8.0 Hz, 1H), 7.71 (t, <i>J</i> = 8.0 Hz, 1H), 7.78 (m, 1H), 7.87 (m, 3H), 8.06 (d, <i>J</i> = 7.6 Hz, 1H), 8.14 (dd, <i>J</i> = 1.6, 8.0 Hz, 1H), 8.59 (t, <i>J</i> = 5.2 Hz, 1H). <sup>13</sup>C NMR (100 MHz, DMSO-<i>d</i><sub>6</sub>) δ 42.3, 59.6, 115.9, 116.2, 119.7, 119.8, 120.5, 126.4, 126.7, 127.2, 127.8, 129.7, 129.8, 129.9, 131.4, 131.5, 131.6, 134.9, 136.0, 136.9, 137.8, 147.3, 151.2, 161.3, 161.6, 164.1, 165.2. HRMS (<i>m/z</i>): [M + H]<sup>+</sup>, calcd for C<sub>25</sub>H<sub>21</sub>FN<sub>3</sub>O<sub>3</sub>, 430.1561; found, 430.1557.</p> |
|   | <p><b>(E)-3-(3-(carboxymethyl)phenyl)-2-(4-cyanostyryl)quinazolin-4(3H)-one (46).</b> This compound was prepared according to the procedure for <b>5</b> in 47% yield (0.64 g). <sup>1</sup>H (500 MHz, DMSO-<i>d</i><sub>6</sub>) δ 3.32 (s, 2H), 6.50 (d, <i>J</i> = 15.55 Hz, 1H), 7.38 (m, 2H), 7.47 (d, <i>J</i> = 7.58 Hz, 1H), 7.56 (m, 4H), 7.80 (m, 3H), 7.90 (m, 2H), 8.15 (d, <i>J</i> = 7.98 Hz, 1H). HRMS (<i>m/z</i>): [M + H]<sup>+</sup>, calcd for C<sub>25</sub>H<sub>18</sub>FN<sub>3</sub>O<sub>3</sub>, 408.1343; found, 408.1362.</p>                                                                                                                                                                                                                                                                                                                                                                                                                                                                                                                                                                                                                                                                                                                                                                                                                                                                  |
|  | <p><b>(E)-3-(3-(acetoxymethyl)phenyl)-2-(4-cyanostyryl)quinazolin-4(3H)-one (47).</b> This compound was prepared according to the procedure for <b>5</b> in 55% yield (0.39 g). <sup>1</sup>H (500 MHz, DMSO-<i>d</i><sub>6</sub>) δ 2.04 (s, 3H), 5.17 (s, 2H), 6.45 (d, <i>J</i> = 15.55 Hz, 1H), 7.45 (d, <i>J</i> = 7.58 Hz, 1H), 7.49 (s, 1H), 7.57 (m, 4H), 7.62 (t, <i>J</i> = 7.58 Hz, 1H), 7.81 (m, 3H), 7.90 (m, 2H), 8.14 (d, <i>J</i> = 7.78 Hz, 1H). HRMS (<i>m/z</i>): [M + H]<sup>+</sup>, calcd for C<sub>26</sub>H<sub>20</sub>FN<sub>3</sub>O<sub>3</sub>, 422.1505; found, 422.1558.</p>                                                                                                                                                                                                                                                                                                                                                                                                                                                                                                                                                                                                                                                                                                                                                                                                                  |
|  | <p><b>(E)-3-(3-fluorophenyl)-2-(4-cyanostyryl)quinazolin-4(3H)-one (48).</b> This compound was prepared according to the procedure for <b>5</b> in 57% yield (1.36 g). <sup>1</sup>H (400 MHz, DMSO-<i>d</i><sub>6</sub>) δ 6.51 (d, <i>J</i> = 15.6 Hz, 1H), 7.35 (d, <i>J</i> = 7.6 Hz, 1H), 7.43 (m, 6H), 7.82 (d, <i>J</i> = 8.0 Hz, 3H), 7.88 (m, 2H), 8.14 (m, 1H). <sup>13</sup>C NMR (100 MHz, DMSO-<i>d</i><sub>6</sub>) δ 112.3, 117.1, 117.3, 117.5, 119.3, 121.4, 123.9, 126.1(2C), 127.2, 127.8, 128.0, 128.9, 131.9, 132.0, 133.5, 135.6, 137.7, 138.0, 139.0, 140.0, 147.8, 151.4, 161.7, 161.8, 164.2. HRMS (<i>m/z</i>): [M + H]<sup>+</sup>, calcd for C<sub>25</sub>H<sub>15</sub>FN<sub>3</sub>O, 368.1194; found, 368.1180.</p>                                                                                                                                                                                                                                                                                                                                                                                                                                                                                                                                                                                                                                                                         |

|                                                                                     |                                                                                                                                                                                                                                                                                                                                                                                                                                                                                                                                                                                                                                                                                                                                                                                                                                                                                                                                                                                                                                                                                                                                                                                                                                                       |
|-------------------------------------------------------------------------------------|-------------------------------------------------------------------------------------------------------------------------------------------------------------------------------------------------------------------------------------------------------------------------------------------------------------------------------------------------------------------------------------------------------------------------------------------------------------------------------------------------------------------------------------------------------------------------------------------------------------------------------------------------------------------------------------------------------------------------------------------------------------------------------------------------------------------------------------------------------------------------------------------------------------------------------------------------------------------------------------------------------------------------------------------------------------------------------------------------------------------------------------------------------------------------------------------------------------------------------------------------------|
| 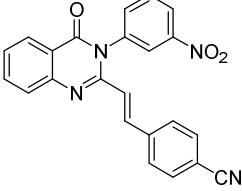   | <p><b>(E)-3-(3-nitrophenyl)-2-(4-cyanostyryl)quinazolin-4(3H)-one (49).</b> This compound was prepared according to the procedure for <b>5</b> in 99% yield (6.32 g). <sup>1</sup>H (500 MHz, DMSO-<i>d</i><sub>6</sub>) δ 6.54 (d, <i>J</i> = 15.35 Hz, 1H), 7.58 (t, <i>J</i> = 7.78 Hz, 1H), 7.67 (d, <i>J</i> = 8.17 Hz, 2H), 7.80 (m, 3H), 7.91 (m, 4H), 8.14 (d, <i>J</i> = 7.98 Hz, 1H), 8.43 (d, <i>J</i> = 8.18 Hz, 1H), 8.52 (s, 1H). <sup>13</sup>C NMR (126 MHz, DMSO-<i>d</i><sub>6</sub>) δ 111.77, 118.80, 120.88, 123.48, 124.50, 124.94, 126.68, 127.24, 127.54, 128.73, 131.16, 132.89, 135.18, 136.10, 137.54, 137.97, 139.35, 147.37, 148.72, 150.76, 161.45. HRMS (<i>m/z</i>): [M + H]<sup>+</sup>, calcd for C<sub>23</sub>H<sub>14</sub>N<sub>4</sub>NaO<sub>3</sub>, 417.0958; found, 417.0941.</p>                                                                                                                                                                                                                                                                                                                                                                                                                          |
|    | <p><b>(E)-3-(3-aminophenyl)-2-(4-cyanostyryl)quinazolin-4(3H)-one (50).</b> This compound was prepared according to the procedure for <b>41</b> from compound <b>49</b> (6.0 g, 15.2 mmol) in 37 % yield (2.24 g). <sup>1</sup>H (500 MHz, DMSO-<i>d</i><sub>6</sub>) δ 5.47 (s, 2H), 6.51 (d, <i>J</i> = 7.78 Hz, 1H), 6.56 (m, 2H), 6.73 (d, <i>J</i> = 8.37 Hz, 1H), 7.23 (t, <i>J</i> = 7.98 Hz, 1H), 7.55 (m, 3H), 7.76 (d, <i>J</i> = 8.17 Hz, 1H), 7.82 (d, <i>J</i> = 8.37 Hz, 2H), 7.87 (t, <i>J</i> = 8.17 Hz, 1H), 7.90 (d, <i>J</i> = 15.55 Hz, 1H), 8.12 (d, <i>J</i> = 7.98 Hz, 1H). <sup>13</sup>C NMR (126 MHz, DMSO-<i>d</i><sub>6</sub>) δ 111.50, 113.50, 114.57, 115.42, 118.61, 120.79, 123.52, 126.48, 126.92, 127.27, 128.00, 130.00, 132.92, 134.73, 136.48, 137.34, 139.43, 147.14, 150.04, 150.89, 160.91. HRMS (<i>m/z</i>): [M + H]<sup>+</sup>, calcd for C<sub>23</sub>H<sub>17</sub>N<sub>4</sub>O, 365.1397; found, 365.1367.</p>                                                                                                                                                                                                                                                                                     |
|  | <p><b>(E)-3-(3-(isopropylamino)phenyl)-2-(4-cyanostyryl)quinazolin-4(3H)-one (51).</b> Compound <b>50</b> (0.15 g, 0.42 mmol) was dissolved in 10 mL CH<sub>2</sub>Cl<sub>2</sub>, to which acetone (92 μL), 3 Å activated molecular sieves, and sodium triacetoxyborohydride (0.18 g, 0.84 mmol) were added. The mixture was stirred at room temperature for 6 days, filtered through celite, and concentrated <i>in vacuo</i>. The residue was purified by silica gel column chromatography to give the product in 13% yield (0.022 g). <sup>1</sup>H (500 MHz, CDCl<sub>3</sub>) δ 1.19 (d, <i>J</i> = 6.0 Hz, 3H), 1.23 (d, <i>J</i> = 6.5 Hz, 3H), 3.59 (m, 1H), 6.53 (s, 1H), 6.59 (m, 2H), 6.78 (d, <i>J</i> = 8.0 Hz, 1H), 7.34 (t, <i>J</i> = 8.0 Hz, 1H), 7.42 (d, <i>J</i> = 8.5 Hz, 2H), 7.47 (m, 1H), 7.58 (d, <i>J</i> = 8.5 Hz, 2H), 7.77 (m, 2H), 7.93 (d, <i>J</i> = 15.5 Hz, 1H), 8.30 (d, <i>J</i> = 7.5 Hz, 1H). <sup>13</sup>C NMR (126 MHz, CDCl<sub>3</sub>) δ 22.6, 22.9, 112.6, 118.7, 121.4, 123.9, 127.2, 127.4, 127.6, 128.3, 130.8, 132.7, 134.8, 137.3, 137.8, 139.9, 147.7, 151.2, 162.1. HRMS (<i>m/z</i>): [M + H]<sup>+</sup>, calcd for C<sub>26</sub>H<sub>23</sub>N<sub>4</sub>O, 407.1866; found, 407.1863.</p> |



|                                                                                     |                                                                                                                                                                                                                                                                                                                                                                                                                                                                                                                                                                                                                                                                                                                                                                                                                                                                                                                                                                                                              |
|-------------------------------------------------------------------------------------|--------------------------------------------------------------------------------------------------------------------------------------------------------------------------------------------------------------------------------------------------------------------------------------------------------------------------------------------------------------------------------------------------------------------------------------------------------------------------------------------------------------------------------------------------------------------------------------------------------------------------------------------------------------------------------------------------------------------------------------------------------------------------------------------------------------------------------------------------------------------------------------------------------------------------------------------------------------------------------------------------------------|
| 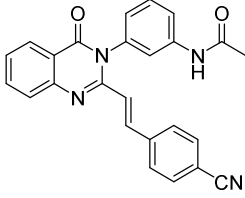   | <p><b>(E)-3-(3-(acetamido)phenyl)-2-(4-cyanostyryl)quinazolin-4(3H)-one (52).</b> This compound was prepared according to the procedure for <b>42</b> from compound <b>50</b> (0.20 g, 0.55 mmol) in 85% yield (0.19 g). <math>^1\text{H}</math> (500 MHz, DMSO-<math>d_6</math>) <math>\delta</math> 3.16 (s, 3H), 6.50 (d, <math>J</math> = 15.55 Hz, 1H), 7.13 (d, <math>J</math> = 7.38 Hz, 1H), 7.56 (m, 4H), 7.71 (d, <math>J</math> = 7.98 Hz, 2H), 7.80 (m, 3H), 7.91 (m, 2H), 8.14 (d, <math>J</math> = 7.98 Hz, 1H), 10.22 (s, 1H). <math>^{13}\text{C}</math> NMR (126 MHz, DMSO-<math>d_6</math>) <math>\delta</math> 24.23, 111.73, 118.77, 119.17, 119.75, 120.90, 123.50, 126.67, 127.22, 127.52, 128.34, 130.14, 133.06, 135.06, 137.03, 137.07, 139.50, 140.64, 147.33, 150.92, 161.24, 168.86. HRMS (<math>m/z</math>): <math>[\text{M} + \text{Na}]^+</math>, calcd for <math>\text{C}_{25}\text{H}_{18}\text{N}_4\text{NaO}_2</math>, 429.1322; found, 429.1291.</p>                     |
|    | <p><b>(E)-3-(3-(acetamidomethyl)phenyl)-2-(4-cyanostyryl)quinazolin-4(3H)-one (53).</b> This compound was prepared according to the procedure for <b>42</b> in 21% yield (0.17 g). <math>^1\text{H}</math> (500 MHz, DMSO-<math>d_6</math>) <math>\delta</math> 1.83 (s, 3H), 4.32 (m, 2H), 6.45 (d, <math>J</math> = 15.5 Hz, 1H), 7.33 (d, <math>J</math> = 5.5 Hz, 2H), 7.44 (d, <math>J</math> = 8.0 Hz, 1H), 7.52 (m, 4H), 7.77 (m, 3H), 7.86 (m, 2H), 8.12 (dd, <math>J</math> = 1.0, 8.0 Hz, 1H), 8.43 (t, <math>J</math> = 11.5 Hz, 1H). <math>^{13}\text{C}</math> NMR (100 MHz, DMSO-<math>d_6</math>) <math>\delta</math> 23.3, 42.4, 112.2, 119.2, 121.4, 124.0, 127.1, 127.6, 127.9, 128.0, 128.1, 128.7, 128.8, 130.2, 133.5, 135.5, 137.4, 137.5, 140.0, 142.3, 147.8, 151.4, 161.8, 170.0. HRMS (<math>m/z</math>): <math>[\text{M} + \text{H}]^+</math>, calcd for <math>\text{C}_{26}\text{H}_{21}\text{N}_4\text{O}_2</math>, 421.1658; found, 421.1675.</p>                              |
|  | <p><b>(E)-3-(3-(methylsulfonamido)phenyl)-2-(4-cyanostyryl)quinazolin-4(3H)-one (54).</b> This compound was prepared according to the procedure for <b>43</b> from compound <b>50</b> (0.36 g, 1 mmol) in 77% yield (0.33 g). <math>^1\text{H}</math> (500 MHz, DMSO-<math>d_6</math>) <math>\delta</math> 3.04 (s, 3H), 6.52 (d, <math>J</math> = 15.75 Hz, 1H), 7.21 (d, <math>J</math> = 7.58 Hz, 1H), 7.27 (s, 1H), 7.37 (d, <math>J</math> = 8.57 Hz, 1H), 7.59 (m, 4H), 7.81 (m, 3H), 7.90 (m, 2H), 8.15 (d, <math>J</math> = 7.98 Hz, 1H), 10.08 (s, 1H). <math>^{13}\text{C}</math> NMR (126 MHz, DMSO-<math>d_6</math>) <math>\delta</math> 111.60, 118.65, 119.73, 120.32, 120.76, 123.51, 125.24, 126.56, 127.12, 127.39, 128.22, 130.60, 132.90, 134.98, 136.89, 137.45, 139.39, 139.62, 147.19, 150.78, 161.10. HRMS (<math>m/z</math>): <math>[\text{M} + \text{Na}]^+</math>, calcd for <math>\text{C}_{24}\text{H}_{18}\text{N}_4\text{NaO}_3\text{S}</math>, 465.0992; found, 465.0973.</p> |
|  | <p><b>(E)-3-(3-(methylsulfonamidomethyl)phenyl)-2-(4-cyanostyryl)quinazolin-4(3H)-one (55).</b> The compound was prepared according to the procedure described previously in 93% yield (68 mg, 75% yield). <math>^1\text{H}</math> (400 MHz, DMSO-<math>d_6</math>) <math>\delta</math> 2.85 (s, 3H), 4.27 (d, <math>J</math> = 6.4 Hz, 1H), 6.49 (d, <math>J</math> = 15.6 Hz, 1H), 7.38 (d, <math>J</math> = 7.2 Hz, 1H), 7.45 (s, 1H), 7.58 (m, 5H), 7.68 (t, <math>J</math> = 6.4 Hz, 1H), 7.81 (m, 3H), 7.90 (t, <math>J</math> = 7.6 Hz, 1H), 7.92 (d, <math>J</math> = 15.6 Hz, 1H), 8.15 (d, <math>J</math> = 8 Hz, 1H). <math>^{13}\text{C}</math> NMR (100 MHz, DMSO-<math>d_6</math>) <math>\delta</math> 40.05, 45.48, 111.54, 118.51, 120.72, 123.37, 126.43, 126.98, 127.29, 127.72, 127.90, 128.14 (2C), 128.51, 129.69,</p>                                                                                                                                                                  |

|                                                                                     |                                                                                                                                                                                                                                                                                                                                                                                                                                                                                                                                                                                                                                                                                                                                                                                                                                                                                                                                                                                                                                                                                                                                                                                                                          |
|-------------------------------------------------------------------------------------|--------------------------------------------------------------------------------------------------------------------------------------------------------------------------------------------------------------------------------------------------------------------------------------------------------------------------------------------------------------------------------------------------------------------------------------------------------------------------------------------------------------------------------------------------------------------------------------------------------------------------------------------------------------------------------------------------------------------------------------------------------------------------------------------------------------------------------------------------------------------------------------------------------------------------------------------------------------------------------------------------------------------------------------------------------------------------------------------------------------------------------------------------------------------------------------------------------------------------|
|                                                                                     | 132.76 (2C), 134.82, 136.74, 136.83, 139.30, 140.30, 147.16, 150.76, 161.12. HRMS ( $m/z$ ): $[M + H]^+$ , calcd for $C_{25}H_{21}N_4O_3S$ , 457.1329; found, 457.1328.                                                                                                                                                                                                                                                                                                                                                                                                                                                                                                                                                                                                                                                                                                                                                                                                                                                                                                                                                                                                                                                  |
| 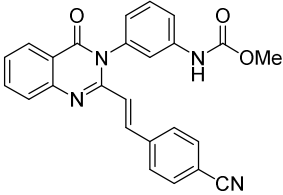   | <p><b>(E)-3-(3-((methyloxycarbonyl)amino)phenyl)-2-(4-cyanostyryl)quinazolin-4(3H)-one (56).</b> Compound <b>50</b> (0.10 g, 0.27 mmol) and methyl chloroformate (100 <math>\mu</math>L, 1.35 mmol) were dissolved in pyridine (5 mL). The reaction was stirred at 25 <math>^{\circ}</math>C overnight (16 h) and water (10 mL) was added. The resulting precipitate was filtered and washed with water, followed by methanol and hexanes to give the product in 68% yield (0.08 g). <math>^1H</math> (500 MHz, DMSO-<math>d_6</math>) <math>\delta</math> 3.66 (s, 3H), 6.50 (d, <math>J</math> = 15.35 Hz, 1H), 7.09 (d, <math>J</math> = 6.98 Hz, 1H), 7.57 (m, 6H), 7.81 (m, 3H), 7.91 (m, 2H), 8.14 (d, <math>J</math> = 7.58 Hz, 1H), 9.96 (s, 1H). <math>^{13}C</math> NMR (126 MHz, DMSO-<math>d_6</math>) <math>\delta</math> 51.84, 111.57, 120.72, 122.72, 123.27, 126.51, 127.06, 128.18, 130.09, 132.88, 134.91, 136.90, 137.07, 139.32, 142.52, 147.15, 150.32, 153.97, 154.64, 161.06, 192.50. HRMS (<math>m/z</math>): <math>[M + Na]^+</math>, calcd for <math>C_{25}H_{18}N_4NaO_3</math>, 445.1271; found, 445.1265.</p>                                                                              |
|   | <p><b>(E)-3-(3-(2-hydroxyethyl)carbonylphenyl)-2-(4-cyanostyryl)quinazolin-4(3H)-one (57).</b> This compound was prepared according to the procedure for <b>45</b> from compound <b>2</b> (0.19 g, 0.5 mmol) in 63 % yield (0.14 g). <math>^1H</math> (400 MHz, DMSO-<math>d_6</math>) <math>\delta</math> 3.28 (m, 2H), 3.51 (q, <math>J</math> = 6.0 Hz, 2H), 4.75 (t, <math>J</math> = 5.6 Hz, 1H), 6.50 (d, <math>J</math> = 15.6 Hz, 1H), 7.57 (m, 3H), 7.63 (m, 2H), 7.81 (d, <math>J</math> = 8.4 Hz, 2H), 7.89 (m, 3H), 8.04 (m, 1H), 8.14 (m, 1H), 8.59 (t, <math>J</math> = 5.6 Hz, 1H). <math>^{13}C</math> NMR (100 MHz, DMSO-<math>d_6</math>) <math>\delta</math> 42.3, 59.6, 111.6, 118.6, 120.6, 126.5, 127.1, 127.4, 127.9, 128.1, 128.2, 129.7, 131.6, 132.8, 135.0, 136.0, 136.7, 137.0, 139.2, 147.2, 150.8, 161.2, 165.2. HRMS (<math>m/z</math>): <math>[M + H]^+</math>, calcd for <math>C_{26}H_{21}N_4O_3</math>, 437.1608; found, 437.1635.</p>                                                                                                                                                                                                                                                |
|  | <p><b>(E)-3-(3-(2-carboxyethyl)carbonylphenyl)-2-(4-cyanostyryl)quinazolin-4(3H)-one (58).</b> The compound was prepared according to the procedure described for <b>28</b> in 56% yield (0.130 g). <math>^1H</math> (600 MHz, MeOD-<math>d_4</math>) <math>\delta</math> 2.64 (t, <math>J</math> = 6.6 Hz, 2H), 3.64 (td, <math>J</math> = 6.6, 2.4 Hz, 2H), 6.55 (d, <math>J</math> = 15.6 Hz, 1H), 7.51 (m, 2H), 7.58 (ddd, <math>J</math> = 7.8, 7.2, 1.2 Hz, 1H), 7.59 (ddd, <math>J</math> = 7.8, 1.8, 1.2 Hz, 1H), 7.67 (m, 2H), 7.73 (td, <math>J</math> = 7.8, 0.6 Hz, 1H), 7.85 (m, 2H), 7.9 (ddd, <math>J</math> = 7.8, 7.2, 1.2 Hz, 1H), 7.95 (d, <math>J</math> = 15.6 Hz, 1H), 8.04 (ddd, <math>J</math> = 7.8, 1.2, 1 Hz, 1H), 8.24 (ddd, <math>J</math> = 7.8, 1.2, 0.6 Hz, 1H). <math>^{13}C</math> NMR (100 MHz, DMSO-<math>d_6</math>) <math>\delta</math> 34.33, 36.38, 112.30, 119.29, 121.38, 124.10, 127.20, 127.83, 128.09, 128.54, 128.80, 128.95 (2C), 130.47, 132.43, 133.56 (2C), 135.69, 136.47, 137.46, 137.73, 139.98, 147.89, 151.47, 161.92, 165.84, 173.53. HRMS (<math>m/z</math>): <math>[M + H]^+</math>, calcd for <math>C_{27}H_{21}N_4O_4</math>, 465.1557; found, 465.1539.</p> |

|                                                                                     |                                                                                                                                                                                                                                                                                                                                                                                                                                                                                                                                                                                                                                                                                                                                                                                                                                                                                                                                                                                                                                                                                                                                                                                                                                                                                                                                                                                                                                  |
|-------------------------------------------------------------------------------------|----------------------------------------------------------------------------------------------------------------------------------------------------------------------------------------------------------------------------------------------------------------------------------------------------------------------------------------------------------------------------------------------------------------------------------------------------------------------------------------------------------------------------------------------------------------------------------------------------------------------------------------------------------------------------------------------------------------------------------------------------------------------------------------------------------------------------------------------------------------------------------------------------------------------------------------------------------------------------------------------------------------------------------------------------------------------------------------------------------------------------------------------------------------------------------------------------------------------------------------------------------------------------------------------------------------------------------------------------------------------------------------------------------------------------------|
| 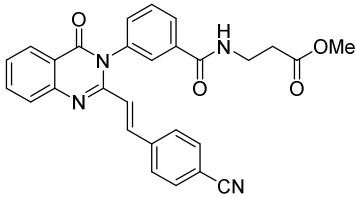   | <p><b>(E)-3-(3-(3-methoxy-3-oxopropyl)carbamoylphenyl)-2-(4-cyanostyryl)quinazolin-4(3H)-one (59).</b> Compound <b>26</b> (0.393 g, 1 mmol) was dissolved in a DMF (15 mL) solution containing HATU (0.418 g, 1.1 mmol). <math>\beta</math>-Alanine methyl ester hydrochloride (0.139 g, 1 mmol) was added and the mixture was stirred for 20 minutes followed by the addition of NMM (0.22 mL, 2 mmol). The reaction was stirred at 25 °C overnight (16 h) and concentrated <i>in vacuo</i>. Water was added to precipitate the product in 83% yield (0.397 g). <math>^1\text{H}</math> (400 MHz, DMSO-<math>d_6</math>) <math>\delta</math> 2.60 (t, <math>J = 7.2</math> Hz, 2H), 3.5 (m, 2H), 3.58 (s, 3H), 6.49 (d, <math>J = 15.6</math> Hz, 1H), 7.58 (m, 3H), 7.65 (m, 1H), 7.72 (m, 1H), 7.81 (m, 3H), 7.91 (m, 3H), 8.03 (d, <math>J = 7.6</math> Hz, 1H), 8.15 (d, <math>J = 8</math> Hz, 1H), 8.68 (t, <math>J = 5.6</math> Hz, 1H). <math>^{13}\text{C}</math> NMR (100 MHz, DMSO-<math>d_6</math>) <math>\delta</math> 33.38, 35.56, 51.33, 111.58, 118.53, 120.64, 123.37, 126.46, 127.09, 127.35, 127.79, 128.07, 128.20 (2C), 129.75, 131.74, 132.80 (2C), 134.95, 135.68, 136.73, 137.00, 139.26, 147.16, 150.73, 161.19, 165.18, 171.68. HRMS (<math>m/z</math>): <math>[\text{M} + \text{H}]^+</math>, calcd for <math>\text{C}_{28}\text{H}_{23}\text{N}_4\text{O}_4</math>, 479.1714; found, 479.1710.</p> |
|   | <p><b>(E)-3-(3-acetoxypentyl)-2-(4-cyanostyryl)quinazolin-4(3H)-one (60).</b> This compound was prepared according to the procedure for <b>5</b> in 37% yield (0.14 g). <math>^1\text{H}</math> (500 MHz, DMSO-<math>d_6</math>) <math>\delta</math> 1.89 (s, 3H), 2.02 (t, <math>J = 5.98</math> Hz, 2H), 4.09 (quin, <math>J = 5.98</math> Hz, 2H), 4.42 (t, <math>J = 6.18</math> Hz, 2H), 7.52 (t, <math>J = 7.78</math> Hz, 1H), 7.60 (d, <math>J = 15.35</math> Hz, 1H), 7.70 (d, <math>J = 8.17</math> Hz, 1H), 7.83 (t, <math>J = 8.17</math> Hz, 1H), 7.92 (d, <math>J = 8.37</math> Hz, 2H), 7.96 (d, <math>J = 15.35</math> Hz, 1H), 8.04 (d, <math>J = 8.37</math> Hz, 2H), 8.13 (d, <math>J = 7.98</math> Hz, 1H). HRMS (<math>m/z</math>): <math>[\text{M} + \text{H}]^+</math>, calcd for <math>\text{C}_{22}\text{H}_{20}\text{N}_3\text{O}_3</math>, 374.1505; found, 374.1543.</p>                                                                                                                                                                                                                                                                                                                                                                                                                                                                                                                             |
|  | <p><b>(E)-3-(1H-pyrazol-3-yl)-2-(4-cyanostyryl)quinazolin-4(3H)-one (61).</b> This compound was prepared according to the procedure for <b>5</b> in 9% yield (0.05 g). <math>^1\text{H}</math> (500 MHz, DMSO-<math>d_6</math>) <math>\delta</math> 6.52 (m, 2H), 7.58 (t, <math>J = 7.98</math> Hz, 1H), 7.62 (d, <math>J = 8.17</math> Hz, 2H), 7.79 (d, <math>J = 8.17</math> Hz, 1H), 7.84 (d, <math>J = 7.78</math> Hz, 2H), 7.92 (m, 2H), 8.03 (s, 1H), 8.15 (d, <math>J = 7.98</math> Hz, 1H). HRMS (<math>m/z</math>): <math>[\text{M} + \text{H}]^+</math>, calcd for <math>\text{C}_{20}\text{H}_{14}\text{N}_5\text{O}</math>, 340.1193; found, 340.1207.</p>                                                                                                                                                                                                                                                                                                                                                                                                                                                                                                                                                                                                                                                                                                                                                         |
|  | <p><b>(E)-3-(pyridine-3-ylmethyl)carbamoylphenyl)-2-(4-cyanostyryl)quinazolin-4(3H)-one (62).</b> This compound was prepared according to the procedure for <b>45</b> from compound <b>2</b> (0.16 g, 0.4 mmol) and pyridine-3-ylmethanamine (0.052 g, 0.52 mmol) in 48 % yield (0.093 g). <math>^1\text{H}</math> (500 MHz, <math>\text{CD}_3\text{Cl}</math>) <math>\delta</math> 4.62 (d, <math>J = 6.0</math> Hz, 2H), 6.37 (d, <math>J = 15.5</math> Hz, 1H), 7.28 (m, 1H), 7.37 (d, <math>J = 8.0</math> Hz, 3H), 7.45 (m, 2H), 7.56 (m, 3H), 7.75 (m, 4H), 7.94 (d, <math>J = 15.5</math> Hz, 1H), 8.01 (d, <math>J = 7.5</math> Hz, 1H), 8.17 (d, <math>J = 8.0</math> Hz, 1H), 8.47 (d, <math>J = 4.5</math> Hz, 1H), 8.57 (s, 1H). <math>^{13}\text{C}</math> NMR (100 MHz, DMSO-<math>d_6</math>) <math>\delta</math> 41.9, 113.1, 118.6, 120.9, 122.9, 124.1, 127.2, 127.5, 127.8, 128.4, 126.7, 130.6, 131.9, 132.8,</p>                                                                                                                                                                                                                                                                                                                                                                                                                                                                                            |

|                                                                                     |                                                                                                                                                                                                                                                                                                                                                                                                                                                                                                                                                                                                                                                                                                                                                                                                                                                                                                                                                                                                                                                                                                                                                                                                                                                                                                                                                         |
|-------------------------------------------------------------------------------------|---------------------------------------------------------------------------------------------------------------------------------------------------------------------------------------------------------------------------------------------------------------------------------------------------------------------------------------------------------------------------------------------------------------------------------------------------------------------------------------------------------------------------------------------------------------------------------------------------------------------------------------------------------------------------------------------------------------------------------------------------------------------------------------------------------------------------------------------------------------------------------------------------------------------------------------------------------------------------------------------------------------------------------------------------------------------------------------------------------------------------------------------------------------------------------------------------------------------------------------------------------------------------------------------------------------------------------------------------------|
|                                                                                     | 134.4, 135.3, 136.5, 136.9, 137.2, 138.4, 139.5, 147.7, 148.5, 149.0, 150.4, 162.4, 166.4. HRMS ( $m/z$ ): $[M + H]^+$ , calcd for $C_{30}H_{22}N_5O_2$ , 484.1768; found, 484.1788.                                                                                                                                                                                                                                                                                                                                                                                                                                                                                                                                                                                                                                                                                                                                                                                                                                                                                                                                                                                                                                                                                                                                                                    |
| 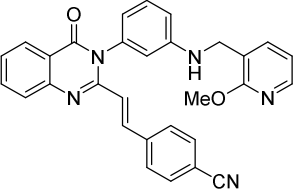   | <p><b>(E)-3-(((2-methoxyphenyl)methyl)aminophenyl)-2-(4-cyanostyryl)quinazolin-4(3H)-one (63).</b> Compound <b>50</b> (0.060 g, 0.165 mmol) was dissolved in 5 mL MeOH, to which 2-methoxynicotinaldehyde (0.045 g, 0.33 mmol), 3 Å activated molecular sieves, and sodium cyanoborohydride (0.021 g, 0.033 mmol) were added. The mixture was stirred at room temperature for 5 days, filtered through celite, and concentrated <i>in vacuo</i>. The residue was purified by silica gel column chromatography to give the product in 37% yield (0.030 g). <math>^1H</math> (500 MHz, <math>CD_3Cl</math>) <math>\delta</math> 3.96 (s, 3H), 4.29 (s, 2H), 6.51 (m, 2H), 6.61 (d, <math>J = 7.5</math> Hz, 1H), 6.69 (t, <math>J = 6.0</math> Hz, 1H), 6.78 (d, <math>J = 8.0</math> Hz, 1H), 7.32 (m, 3H), 7.47 (m, 2H), 7.60 (d, <math>J = 8.0</math> Hz, 2H), 7.80 (d, <math>J = 7.5</math> Hz, 2H), 7.95 (m, 2H), 8.29 (d, <math>J = 7.5</math> Hz, 1H). <math>^{13}C</math> NMR (100 MHz, <math>DMSO-d_6</math>) <math>\delta</math> 43.1, 53.7, 112.8, 112.9, 114.6, 116.9, 117.5, 118.7, 120.9, 121.2, 123.2, 127.3, 127.4, 127.5, 128.4, 130.9, 132.7, 135.0, 136.9, 137.7, 138.0, 139.8, 145.7, 147.2, 149.5, 151.4. HRMS (<math>m/z</math>): <math>[M + H]^+</math>, calcd for <math>C_{30}H_{24}N_5O_2</math>, 486.1925; found, 486.1941.</p> |
|  | <p><b>(E)-3-(3-hydroxyphenyl)-2-(4-fluorostyryl)pyrido[4,3-d]pyrimidin-4(3H)-one (64).</b> This compound was prepared according to the procedure for <b>5</b> in 34% yield (0.098 g) as acetate salt. <math>^1H</math> (400 MHz, <math>DMSO-d_6</math>) <math>\delta</math> 1.91 (s, 3H), 6.33 (d, <math>J = 15.6</math> Hz, 1H), 6.87 (m, 2H), 6.89 (m, 1H), 7.22 (m, 2H), 7.41 (t, <math>J = 8.4</math> Hz, 1H), 7.46 (m, 2H), 7.62 (m, 1H), 7.99 (d, <math>J = 15.6</math> Hz, 1H), 8.84 (m, 1H), 9.26 (d, <math>J = 2.4</math> Hz, 1H), 9.96 (s, 1H), 11.98 (s, 1H). <math>^{13}C</math> NMR (100 MHz, <math>DMSO-d_6</math>) <math>\delta</math> 21.0, 115.8, 116.1, 116.3, 116.4, 116.6, 119.2, 119.3, 119.4, 120.1, 130.0, 130.1, 130.5, 131.1, 131.2, 137.2, 139.7, 149.9, 152.3, 153.4, 155.8, 158.4, 160.6, 161.9, 164.3, 172.1. HRMS (<math>m/z</math>): <math>[M + H]^+</math>, calcd for <math>C_{21}H_{15}FN_3O_2</math>, 360.1143; found, 360.1163.</p>                                                                                                                                                                                                                                                                                                                                                                                  |
|  | <p><b>(E)-3-(3-hydroxyphenyl)-2-(4-chlorostyryl)pyrido[4,3-d]pyrimidin-4(3H)-one (65).</b> This compound was prepared according to the procedure for <b>5</b> in 29 % yield (0.087g) as acetate salt. <math>^1H</math> (400 MHz, <math>DMSO-d_6</math>) <math>\delta</math> 1.91 (s, 3H), 6.39 (d, <math>J = 15.6</math> Hz, 1H), 6.88 (m, 2H), 6.97 (m, 1H), 7.39 (m, 5H), 7.63 (m, 1H), 7.98 (d, <math>J = 15.2</math> Hz, 1H), 8.85 (d, <math>J = 5.6</math> Hz, 1H), 9.26 (s, 1H), 9.97 (s, 1H), 11.98 (s, 1H). <math>^{13}C</math> NMR (100 MHz, <math>DMSO-d_6</math>) <math>\delta</math> 21.1, 115.7, 116.4, 116.6, 119.1, 120.1, 120.2, 129.2, 129.4, 130.5, 133.4, 134.8, 137.2, 139.5, 149.9, 152.2, 153.4, 155.7, 158.4, 160.5, 172.0. HRMS (<math>m/z</math>): <math>[M + H]^+</math>, calcd for <math>C_{21}H_{15}ClN_3O_2</math>, 376.0847; found, 376.0863.</p>                                                                                                                                                                                                                                                                                                                                                                                                                                                                         |

|                                                                                     |                                                                                                                                                                                                                                                                                                                                                                                                                                                                                                                                                                                                                                                                                                                                                                                                                                                                                                                                                    |
|-------------------------------------------------------------------------------------|----------------------------------------------------------------------------------------------------------------------------------------------------------------------------------------------------------------------------------------------------------------------------------------------------------------------------------------------------------------------------------------------------------------------------------------------------------------------------------------------------------------------------------------------------------------------------------------------------------------------------------------------------------------------------------------------------------------------------------------------------------------------------------------------------------------------------------------------------------------------------------------------------------------------------------------------------|
| 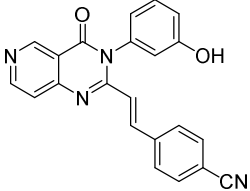   | <p><b>(E)-3-(3-hydroxyphenyl)-2-(4-cyanostyryl)pyrido[4,3-d]pyrimidin-4(3H)-one (66).</b> This compound was prepared according to the procedure for <b>5</b> in 45% yield (0.15 g) as acetate salt. <sup>1</sup>H (400 MHz, DMSO-<i>d</i><sub>6</sub>) δ 1.91 (s, 3H), 6.52 (d, <i>J</i> = 15.6 Hz, 1H), 6.88 (m, 2H), 6.97 (m, 1H), 7.41 (t, <i>J</i> = 8.4 Hz, 1H), 7.58 (d, <i>J</i> = 8.4 Hz, 1H), 7.65 (t, <i>J</i> = 5.6 Hz, 1H), 7.84 (d, <i>J</i> = 8.4 Hz, 1H), 8.00 (d, <i>J</i> = 15.6 Hz, 1H), 8.87 (d, <i>J</i> = 5.6 Hz, 1H), 9.26 (s, 1H), 9.98 (s, 1H), 11.98 (s, 1H). <sup>13</sup>C NMR (100 MHz, DMSO-<i>d</i><sub>6</sub>) δ 21.0, 111.9, 115.7, 116.5, 116.7, 118.5, 119.1, 120.2, 122.9, 128.3, 130.5, 132.9, 137.0, 138.7, 138.9, 149.9, 152.1, 153.5, 155.3, 158.4, 160.5, 172.0. HRMS (<i>m/z</i>): [M + H]<sup>+</sup>, calcd for C<sub>22</sub>H<sub>15</sub>N<sub>4</sub>O<sub>2</sub>, 367.1190; found, 367.1177.</p> |
|    | <p><b>(E)-3-(3-carboxyphenyl)-2-(4-fluorostyryl)pyrido[4,3-d]pyrimidin-4(3H)-one (67).</b> This compound was prepared according to the procedure described previously in 27% yield (0.12 g). <sup>1</sup>H (400 MHz, DMSO-<i>d</i><sub>6</sub>) δ 6.26 (d, <i>J</i> = 15.2 Hz, 1H), 7.20 (t, <i>J</i> = 8.8 Hz, 2H), 7.48 (m, 2H), 7.65 (d, <i>J</i> = 6.0 Hz, 1H), 7.75 (m, 2H), 8.00 (d, <i>J</i> = 15.6 Hz, 1H), 8.08 (m, 1H), 8.14 (m, 1H), 8.86 (d, <i>J</i> = 5.6 Hz, 1H), 9.25 (s, 1H), 13.27 (s, br, 1H). <sup>13</sup>C NMR (100 MHz, DMSO-<i>d</i><sub>6</sub>) δ 116.0, 116.3, 116.4, 119.2, 119.3, 120.2, 129.9, 130.1, 130.2, 130.3, 131.0, 131.1, 132.4, 133.3, 136.6, 140.1, 149.8, 152.3, 153.5, 155.7, 160.8, 161.9, 164.4, 166.5. HRMS (<i>m/z</i>): [M + H]<sup>+</sup>, calcd for C<sub>22</sub>H<sub>15</sub>FN<sub>3</sub>O<sub>3</sub>, 388.1092; found, 388.1075.</p>                                                      |
|  | <p><b>(E)-3-(3-carboxyphenyl)-2-(4-chlorostyryl)pyrido[4,3-d]pyrimidin-4(3H)-one (68).</b> This compound was prepared according to the procedure described previously in 23 % yield (0.093 g). <sup>1</sup>H (400 MHz, DMSO-<i>d</i><sub>6</sub>) δ 6.33 (d, <i>J</i> = 15.2 Hz, 1H), 7.42 (m, 4H), 7.66 (d, <i>J</i> = 5.6 Hz, 1H), 7.75 (m, 2H), 7.99 (d, <i>J</i> = 15.6 Hz, 1H), 8.08 (d, <i>J</i> = 2.0 Hz, 1H), 8.13 (m, 1H), 8.87 (d, <i>J</i> = 5.6 Hz, 1H), 9.27 (s, 1H). 13.31 (s, br, 1H). <sup>13</sup>C NMR (100 MHz, DMSO-<i>d</i><sub>6</sub>) δ 116.5, 120.2, 120.3, 129.1, 129.7, 129.9, 130.1, 130.3, 132.4, 133.3, 133.4, 134.8, 136.6, 139.9, 149.8, 152.3, 153.6, 155.6, 160.9, 166.5. HRMS (<i>m/z</i>): [M + H]<sup>+</sup>, calcd for C<sub>22</sub>H<sub>15</sub>ClN<sub>3</sub>O<sub>3</sub>, 404.0796; found, 404.0769.</p>                                                                                             |
|  | <p><b>(E)-3-(3-carboxyphenyl)-2-(4-cyanostyryl)pyrido[4,3-d]pyrimidin-4(3H)-one (69).</b> This compound was prepared according to the procedure described previously in 31% yield (0.12 g). <sup>1</sup>H (400 MHz, DMSO-<i>d</i><sub>6</sub>) δ 6.49 (d, <i>J</i> = 15.6 Hz, 1H), 7.63 (d, <i>J</i> = 8.4 Hz, 2H), 7.68 (d, <i>J</i> = 5.6 Hz, 1H), 7.74 (m, 2H), 7.82 (d, <i>J</i> = 8.0 Hz, 2H), 8.02 (d, <i>J</i> = 15.6 Hz, 1H), 8.09 (s, 1H), 8.13 (m, 1H), 8.89 (d, <i>J</i> = 5.6 Hz, 1H), 9.28 (s, 1H), 13.31 (s, br, 1H). <sup>13</sup>C NMR (100 MHz, DMSO-<i>d</i><sub>6</sub>) δ 2.0, 116.6, 118.5, 120.3, 122.9, 128.6, 129.9, 130.1, 130.4, 132.4, 132.9, 133.3, 136.4, 138.9, 139.1, 149.9, 152.2, 153.7, 155.3, 160.8, 166.5. HRMS (<i>m/z</i>): [M + H]<sup>+</sup>, calcd for C<sub>23</sub>H<sub>15</sub>N<sub>4</sub>O<sub>3</sub>, 395.1139; found,</p>                                                                      |

|                                                                                     |                                                                                                                                                                                                                                                                                                                                                                                                                                                                                                                                                                                                                                                                                                                                                                                                                                                                                                                                                                                                                                                                                                                                                                                                                                                                                              |
|-------------------------------------------------------------------------------------|----------------------------------------------------------------------------------------------------------------------------------------------------------------------------------------------------------------------------------------------------------------------------------------------------------------------------------------------------------------------------------------------------------------------------------------------------------------------------------------------------------------------------------------------------------------------------------------------------------------------------------------------------------------------------------------------------------------------------------------------------------------------------------------------------------------------------------------------------------------------------------------------------------------------------------------------------------------------------------------------------------------------------------------------------------------------------------------------------------------------------------------------------------------------------------------------------------------------------------------------------------------------------------------------|
|                                                                                     | 395.1143.                                                                                                                                                                                                                                                                                                                                                                                                                                                                                                                                                                                                                                                                                                                                                                                                                                                                                                                                                                                                                                                                                                                                                                                                                                                                                    |
| 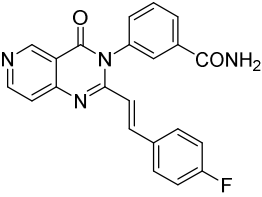   | <p><b>(E)-3-(3-carbomylphenyl)-2-(4-fluorostyryl)pyrido[4,3-d]pyrimidin-4(3H)-one (70).</b> This compound was prepared according to the procedure for <b>72</b> from compound <b>67</b> (0.12 g, 0.31 mmol) in 69 % yield (0.083 g). <sup>1</sup>H (400 MHz, DMSO-<i>d</i><sub>6</sub>) δ 6.28 (d, <i>J</i> = 15.6 Hz, 1H), 7.21 (t, <i>J</i> = 8.8 Hz, 2H), 7.47 (m, 2H), 7.56 (s, br, 1H), 7.65 (m, 3H), 7.98 (s, br, 1H), 8.01 (d, <i>J</i> = 15.6 Hz, 1H), 8.08 (m, 2H), 8.87 (5.6 Hz, 1H), 9.27 (s, 1H). <sup>13</sup>C NMR (100 MHz, DMSO-<i>d</i><sub>6</sub>) δ 116.1, 116.2, 116.3, 119.3, 120.2, 128.1, 128.4, 129.8, 130.2, 130.3, 131.0, 131.1, 131.6, 135.8, 136.3, 140.1, 149.9, 152.3, 153.6, 155.8, 160.8, 161.9, 164.4, 166.7. HRMS (<i>m/z</i>): [M + H]<sup>+</sup>, calcd for C<sub>22</sub>H<sub>16</sub>FN<sub>4</sub>O<sub>2</sub>, 387.1252; found, 387.1262.</p>                                                                                                                                                                                                                                                                                                                                                                                                    |
|    | <p><b>(E)-3-(3-carbomylphenyl)-2-(4-chlorostyryl)pyrido[4,3-d]pyrimidin-4(3H)-one (71).</b> This compound was prepared according to the procedure for <b>72</b> from compound <b>68</b> (0.125 g, 0.31 mmol) in 68% yield (0.085 g). <sup>1</sup>H (400 MHz, DMSO-<i>d</i><sub>6</sub>) 6.34 (d, <i>J</i> = 15.2 Hz, 1H), 7.41 (m, 4H), 7.55 (s, br, 1H), 7.66 (m, 3H), 7.98 (s, br, 1H), 8.00 (d, <i>J</i> = 15.6 Hz, 2H), 8.08 (m, 2H), 8.88 (d, <i>J</i> = 5.6 Hz, 1H), 9.28 (s, 1H). <sup>13</sup>C NMR (100 MHz, DMSO-<i>d</i><sub>6</sub>) δ 116.3, 120.1, 120.2, 128.2, 128.4, 129.1, 129.6, 129.8, 131.6, 133.3, 134.8, 135.8, 136.3, 139.9, 149.8, 152.2, 153.6, 155.6, 160.7, 166.7. HRMS (<i>m/z</i>): [M + H]<sup>+</sup>, calcd for C<sub>22</sub>H<sub>16</sub>ClN<sub>4</sub>O<sub>2</sub>, 403.0956; found, 403.0934.</p>                                                                                                                                                                                                                                                                                                                                                                                                                                                    |
|  | <p><b>(E)-3-(3-carbomylphenyl)-2-(4-cyanostyryl)pyrido[4,3-d]pyrimidin-4(3H)-one (72).</b> Compound <b>69</b> (0.10 g, 0.26 mmol) was dissolved in 6 mL DMF, to which EDCI (0.082 g, 0.42 mmol), HOAt (0.035 g, 0.26 mmol), and NH<sub>4</sub>Cl (0.069 g, 1.29 mmol) were added. The reaction was stirred at room temperature for 14 h and 100 mL EtOAc was added to the mixture and washed three times with saturated NH<sub>4</sub>Cl. The organic phase was dried over Na<sub>2</sub>SO<sub>4</sub>, concentrated <i>in vacuo</i>, and purified by silica gel column chromatography to give the product in 77% yield (0.078 g). <sup>1</sup>H (400 MHz, DMSO-<i>d</i><sub>6</sub>) δ 6.49 (d, <i>J</i> = 15.6 Hz, 1H), 7.56 (s, br, 1H), 7.60 (d, <i>J</i> = 8.0 Hz, 1H), 7.67 (m, 3H), 7.82 (d, <i>J</i> = 8.4 Hz, 2H), 7.99 (s, br, 1H), 8.02 (d, <i>J</i> = 15.6 Hz, 1H), 8.04 (m, 2H), 8.89 (d, <i>J</i> = 5.6 Hz, 1H), 9.28 (s, 1H). <sup>13</sup>C NMR (100 MHz, DMSO-<i>d</i><sub>6</sub>) δ 112.0, 116.4, 118.5, 120.3, 122.9, 128.1, 128.5, 129.8, 131.6, 132.9, 135.8, 136.1, 138.9, 139.1, 149.9, 152.1, 153.7, 155.3, 160.7, 166.7. HRMS (<i>m/z</i>): [M + H]<sup>+</sup>, calcd for C<sub>23</sub>H<sub>16</sub>N<sub>5</sub>O<sub>2</sub>, 394.1299; found, 394.1318.</p> |

|                                                                                     |                                                                                                                                                                                                                                                                                                                                                                                                                                                                                                                                                                                                                                                                                                                                                                                                                                                                                                                                                                                                                                            |
|-------------------------------------------------------------------------------------|--------------------------------------------------------------------------------------------------------------------------------------------------------------------------------------------------------------------------------------------------------------------------------------------------------------------------------------------------------------------------------------------------------------------------------------------------------------------------------------------------------------------------------------------------------------------------------------------------------------------------------------------------------------------------------------------------------------------------------------------------------------------------------------------------------------------------------------------------------------------------------------------------------------------------------------------------------------------------------------------------------------------------------------------|
| 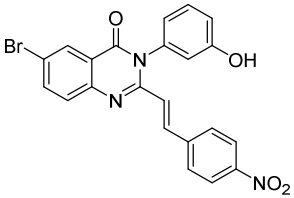   | <p><b>(E)-6-bromo-3-(3-hydroxyphenyl)-2-(4-nitrostyryl)quinazolin-4(3H)-one (73).</b> This compound was prepared according to the procedure for <b>5</b> in 43% yield (0.088 g). <math>^1\text{H}</math> (300 MHz, DMSO-<math>d_6</math>) <math>\delta</math> 6.49 (d, <math>J = 15.55</math> Hz, 1H), 6.87 (m, 2H), 6.99 (d, <math>J = 7.65</math> Hz, 1H), 7.42 (t, <math>J = 8.13</math> Hz, 1H), 7.58 (d, <math>J = 8.61</math> Hz, 2H), 7.70 (d, <math>J = 8.61</math> Hz, 1H), 7.86 (d, <math>J = 6.46</math> Hz, 1H), 7.93 (d, <math>J = 15.79</math> Hz, 1H), 8.00 (d, <math>J = 8.61</math> Hz, 1H), 8.14 (s, 1H), 8.16 (d, <math>J = 8.61</math> Hz, 2H). HRMS (<math>m/z</math>): <math>[\text{M} + \text{H}]^+</math>, calcd for <math>\text{C}_{22}\text{H}_{15}\text{BrN}_3\text{O}_4</math> 464.0240; found, 464.0267.</p>                                                                                                                                                                                                  |
|    | <p><b>(E)-2-(4-fluorostyryl)-6-hydroxy-3-(3-hydroxyphenyl)quinazolin-4(3H)-one (74).</b> This compound was prepared according to the procedure for <b>5</b> in 42% yield (0.37 g). <math>^1\text{H}</math> (500 MHz, DMSO-<math>d_6</math>) <math>\delta</math> 6.29 (d, <math>J = 15.55</math> Hz, 1H), 6.79 (m, 2H), 6.96 (d, <math>J = 6.78</math> Hz, 1H), 7.21 (t, <math>J = 8.37</math> Hz, 2H), 7.32 (d, <math>J = 8.57</math> Hz, 1H), 7.41 (m, 5H), 7.64 (d, <math>J = 8.57</math> Hz, 1H), 7.73 (d, <math>J = 15.95</math> Hz, 1H), 9.91 (s, 1H), 10.16 (s, 1H). HRMS (<math>m/z</math>): <math>[\text{M} + \text{H}]^+</math>, calcd for <math>\text{C}_{22}\text{H}_{16}\text{FN}_2\text{O}_3</math>, 375.1139; found, 375.1152.</p>                                                                                                                                                                                                                                                                                           |
|  | <p><b>(E)-2-(4-cyanostyryl)-7-nitro-3-(3-carboxyphenyl)quinazolin-4(3H)-one (75).</b> The compound was prepared according to the procedure for <b>2</b> described previously in 75% yield (0.328 g). <math>^1\text{H}</math> (600 MHz, DMSO-<math>d_6</math>) <math>\delta</math> 6.48 (d, <math>J = 15</math> Hz, 1H), 7.60 (d, <math>J = 8.4</math> Hz, 2H), 7.77 (m, 4H), 8.01 (d, <math>J = 15.6</math> Hz, 1H), 8.11 (s, 1H), 8.15 (m, 1H), 8.24 (dd, <math>J = 9.0, 2.4</math> Hz, 1H), 8.33 (d, <math>J = 9</math> Hz, 1H), 8.46 (d, <math>J = 2.4</math> Hz, 1H), 13.3 (s, 1H). <math>^{13}\text{C}</math> NMR (151 MHz, DMSO-<math>d_6</math>) <math>\delta</math> 111.88, 118.52, 120.28, 122.11, 122.73, 125.12, 128.46 (2C), 128.78, 129.85, 130.17, 130.39, 132.47, 132.85 (2C), 133.22, 136.53, 138.48, 138.91, 147.61, 151.39, 152.92, 160.49, 166.45. HRMS (<math>m/z</math>): <math>[\text{M} + \text{H}]^+</math>, calcd for <math>\text{C}_{24}\text{H}_{15}\text{N}_4\text{O}_5</math>, 439.1037; found, 439.1016.</p> |
|  | <p><b>(E)-2-(4-cyanostyryl)-7-carboxy-3-(3-carboxyphenyl)quinazolin-4(3H)-one (76).</b> The compound was prepared following a modified procedure of the previously reported method (328 mg, 75% yield).<sup>1</sup> Triethylamine (0.81 mL, 5.8 mmol) was added to a suspension of 4-carboxyanthranilic acid (1 g, 5.8 mmol) in toluene (50 mL) and stirred for 20 minutes at 70 °C. Subsequently triethyl orthoacetate (1.8 mL, 9.8 mmol) was added and the resulting mixture was refluxed for 16 h. The product was crystallized by cooling the reaction on ice for 4 h, filtered from the reaction mixture and washed liberally with hexanes to give the product in 63% yield (0.753 g). <math>^1\text{H}</math> (600 MHz, DMSO-<math>d_6</math>) <math>\delta</math> 6.48 (d, <math>J = 15.6</math> Hz, 1H), 7.60 (d, <math>J = 8.4</math> Hz, 2H), 7.75 (m, 2H), 7.80 (d, <math>J = 8.4</math> Hz, 2H), 7.92 (d, <math>J = 15</math> Hz, 1H), 8.02 (dd, <math>J = 8.4, 1.8</math> Hz, 1H), 8.07 (m, 1H), 8.14 (m,</p>                 |

|                                                                                   |                                                                                                                                                                                                                                                                                                                                                                                                                                                                                                                                                                                                                                                                                                                                                                                                                                                                                                                                                                                |
|-----------------------------------------------------------------------------------|--------------------------------------------------------------------------------------------------------------------------------------------------------------------------------------------------------------------------------------------------------------------------------------------------------------------------------------------------------------------------------------------------------------------------------------------------------------------------------------------------------------------------------------------------------------------------------------------------------------------------------------------------------------------------------------------------------------------------------------------------------------------------------------------------------------------------------------------------------------------------------------------------------------------------------------------------------------------------------|
|                                                                                   | 1H), 8.23 (d, $J = 8.4$ Hz, 1H), 8.27 (d, $J = 1.2$ Hz, 1H), 13.41 (s, 2H). $^{13}\text{C}$ NMR (150 MHz, DMSO- $d_6$ ) $\delta$ 112.11, 119.02, 123.52, 124.07, 126.98, 127.55, 128.79 (2C), 128.85, 130.37, 130.54, 130.68, 132.83, 133.28 (2C), 133.79, 136.84, 137.27, 138.05, 139.57, 147.54, 152.02, 161.37, 166.89, 166.94. HRMS ( $m/z$ ): $[\text{M} + \text{H}]^+$ , calcd for $\text{C}_{25}\text{H}_{16}\text{N}_3\text{O}_5$ , 438.1084; found, 438.1061.                                                                                                                                                                                                                                                                                                                                                                                                                                                                                                         |
| 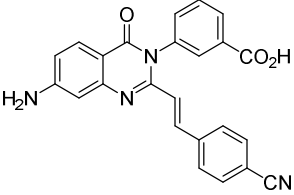 | <p><b>(E)-2-(4-cyanostyryl)-7-amino-3-(3-carboxyphenyl)quinazolin-4(3H)-one (77).</b> This compound was prepared according to the procedure for <b>41</b> from compound <b>75</b> in 67 % yield (0.124 g). <math>^1\text{H}</math> (600 MHz, DMSO-<math>d_6</math>) <math>\delta</math> 6.42 (d, <math>J = 15.6</math> Hz, 1H), 6.83 (d, <math>J = 8.4</math> Hz, 1H), 6.87 (s, 1H), 7.58 (m, 2H), 7.68 (m, 2H), 7.78 (m, 3H), 7.86 (d, <math>J = 15.6</math> Hz, 1H), 7.91 (s, 1H), 8.08 (d, <math>J = 7.8</math> Hz, 1H). <math>^{13}\text{C}</math> NMR (150 MHz, DMSO-<math>d_6</math>) <math>\delta</math> 106.66, 109.17, 111.55, 115.73, 118.69, 123.18, 127.94, 128.35 (2C), 129.77, 129.95, 129.99, 130.09, 132.25, 132.89 (2C), 133.36, 137.03, 137.15, 139.37, 150.99, 154.82, 160.38, 166.52. HRMS (<math>m/z</math>): <math>[\text{M} + \text{H}]^+</math>, calcd for <math>\text{C}_{24}\text{H}_{17}\text{N}_4\text{O}_3</math>, 409.1295; found, 409.1324.</p> |

**Table S2.** MICs of reported compounds against *S. aureus* and *E. faecium*

| Structure                                                                           | Number | MIC ( $\mu\text{g/mL}$ )<br><i>S. aureus</i><br>ATCC 29213 | MIC ( $\mu\text{g/mL}$ )<br><i>E. faecium</i><br>NCTC 7171 |
|-------------------------------------------------------------------------------------|--------|------------------------------------------------------------|------------------------------------------------------------|
| 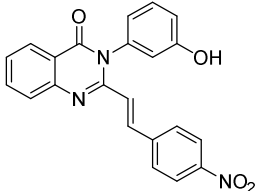 | 1      | 2                                                          | 32                                                         |
|  | 2      | >128                                                       | 8                                                          |
|  | 3      | 128                                                        | 64                                                         |
|  | 4      | 0.25                                                       | >128                                                       |



|                                                                                     |           |       |      |
|-------------------------------------------------------------------------------------|-----------|-------|------|
| 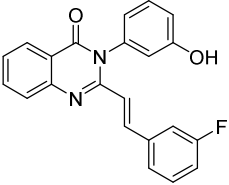   | <b>5</b>  | 1     | 128  |
|    | <b>6</b>  | 1     | 32   |
|    | <b>7</b>  | 0.125 | 32   |
|    | <b>8</b>  | 128   | 16   |
|   | <b>9</b>  | 0.25  | 32   |
|  | <b>10</b> | 0.5   | >128 |
|  | <b>11</b> | >128  | >128 |
|  | <b>12</b> | >128  | >128 |

|                                                                                     |           |       |      |
|-------------------------------------------------------------------------------------|-----------|-------|------|
| 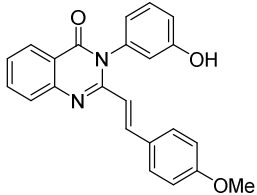   | <b>13</b> | 4     | >128 |
|    | <b>14</b> | 0.03  | 64   |
|    | <b>15</b> | 0.003 | 16   |
|    | <b>16</b> | 16    | 32   |
|   | <b>17</b> | >128  | >128 |
|  | <b>18</b> | 0.5   | 64   |
|  | <b>19</b> | 2     | 32   |
|  | <b>20</b> | 2     | >128 |

|  |           |      |      |
|--|-----------|------|------|
|  | <b>21</b> | 128  | 128  |
|  | <b>22</b> | 0.06 | >128 |
|  | <b>23</b> | 0.06 | >128 |
|  | <b>24</b> | 32   | >128 |
|  | <b>25</b> | 128  | 128  |
|  | <b>26</b> | 2    | >128 |
|  | <b>27</b> | 0.03 | >128 |
|  | <b>28</b> | 2    | >128 |

|                                                                                     |           |      |      |
|-------------------------------------------------------------------------------------|-----------|------|------|
| 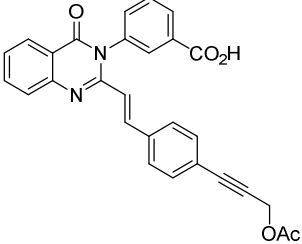   | <b>29</b> | 0.25 | >128 |
|    | <b>30</b> | 1    | >128 |
|    | <b>31</b> | 2    | >128 |
|   | <b>32</b> | 2    | >128 |
|  | <b>33</b> | >128 | >128 |
|  | <b>34</b> | 8    | >128 |
|  | <b>35</b> | 2    | >128 |
|  | <b>36</b> | >128 | 64   |

|                                                                                     |           |       |      |
|-------------------------------------------------------------------------------------|-----------|-------|------|
| 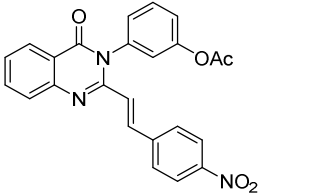   | <b>37</b> | >128  | 64   |
|    | <b>38</b> | >128  | 32   |
|    | <b>39</b> | >128  | >128 |
|   | <b>40</b> | >128  | >128 |
|  | <b>41</b> | 2     | 128  |
|  | <b>42</b> | 1     | >128 |
|  | <b>43</b> | 0.125 | >128 |
|  | <b>44</b> | 4     | >128 |

|                                                                                     |           |      |      |
|-------------------------------------------------------------------------------------|-----------|------|------|
| 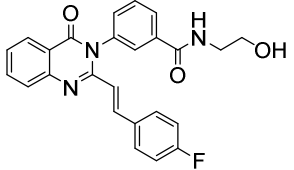   | <b>45</b> | 2    | >128 |
|    | <b>46</b> | 8    | >128 |
|    | <b>47</b> | 0.03 | >128 |
|    | <b>48</b> | >128 | >128 |
|   | <b>49</b> | >128 | >128 |
|  | <b>50</b> | 0.5  | >128 |
|  | <b>51</b> | 0.01 | >128 |
|  | <b>52</b> | 0.25 | >128 |

|                                                                                     |           |       |      |
|-------------------------------------------------------------------------------------|-----------|-------|------|
| 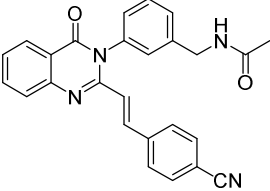   | <b>53</b> | 0.015 | >128 |
|    | <b>54</b> | 0.004 | >128 |
|    | <b>55</b> | 4     | >128 |
|    | <b>56</b> | 0.5   | >128 |
|   | <b>57</b> | 1     | >128 |
|  | <b>58</b> | 32    | >128 |
|  | <b>59</b> | 8     | >128 |
|  | <b>60</b> | >128  | >128 |

|                                                                                     |           |     |      |
|-------------------------------------------------------------------------------------|-----------|-----|------|
| 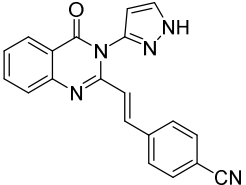   | <b>61</b> | 0.5 | >128 |
|    | <b>62</b> | 8   | >128 |
|    | <b>63</b> | 2   | >128 |
|    | <b>64</b> | 1   | >128 |
|   | <b>65</b> | 1   | >128 |
|  | <b>66</b> | 0.5 | 128  |
|  | <b>67</b> | 64  | >128 |
|  | <b>68</b> | 64  | >128 |



|                                                                                     |           |      |      |
|-------------------------------------------------------------------------------------|-----------|------|------|
| 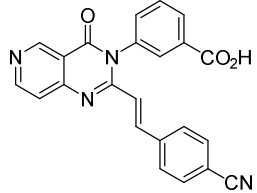   | <b>69</b> | >128 | >128 |
|    | <b>70</b> | >128 | >128 |
|    | <b>71</b> | >128 | >128 |
|    | <b>72</b> | >128 | >128 |
|  | <b>73</b> | >128 | >128 |
|  | <b>74</b> | 32   | 32   |
|  | <b>75</b> | 64   | >128 |
|  | <b>76</b> | 128  | >128 |

|                                                                                   |    |    |      |
|-----------------------------------------------------------------------------------|----|----|------|
| 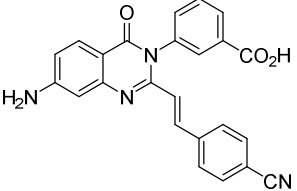 | 77 | 32 | >128 |
|-----------------------------------------------------------------------------------|----|----|------|

## References

1. Bouley, R.; Kumarasiri, M.; Peng, Z.; Otero, L. H.; Song, W.; Suckow, M. A.; Schroeder, V. A.; Wolter, W. R.; Lastochkin, E.; Antunes, N. T.; Pi, H.; Vakulenko, S.; Hermoso, J. A.; Chang, M.; Mobashery, S. Discovery of antibiotic (E)-3-(3-carboxyphenyl)-2-(4-cyanostyryl)quinazolin-4(3H)-one. *J. Am. Chem. Soc.* **2015**, *137*, 1738-1741.
